# Supplementary material for: Morita–Baylis–Hillman acetates of acetylenic aldehydes: versatile synthons for substituted pyrroles via a metal-free tandem reaction
Source: Royal Society of Chemistry journal article supplement (doi:10.1039/c1ob05402c), 2011-01-01

## Morita-Baylis-Hillman Acetates of Acetylenic Aldehydes: Versatile Synthons for Substituted Pyrroles *via* a Metal-Free Tandem Reaction

Chada Raji Reddy,\* Motatipally Damoder Reddy, Boinapally Srikanth and  
Kothakonda Rajendra Prasad

*Organic Chemistry Division-I, Indian Institute of Chemical Technology, Hyderabad, India-500 607*

[rajireddy@iict.res.in](mailto:rajireddy@iict.res.in)

### Supporting information

#### Contents

- S2-S49** - **Copies of  $^1\text{H}$  and  $^{13}\text{C}$  NMR spectra**
- S50-S51** - **Copies of NOESY spectra for 4a and 4b**

### Copies of $^1\text{H}$ and $^{13}\text{C}$ NMR spectra

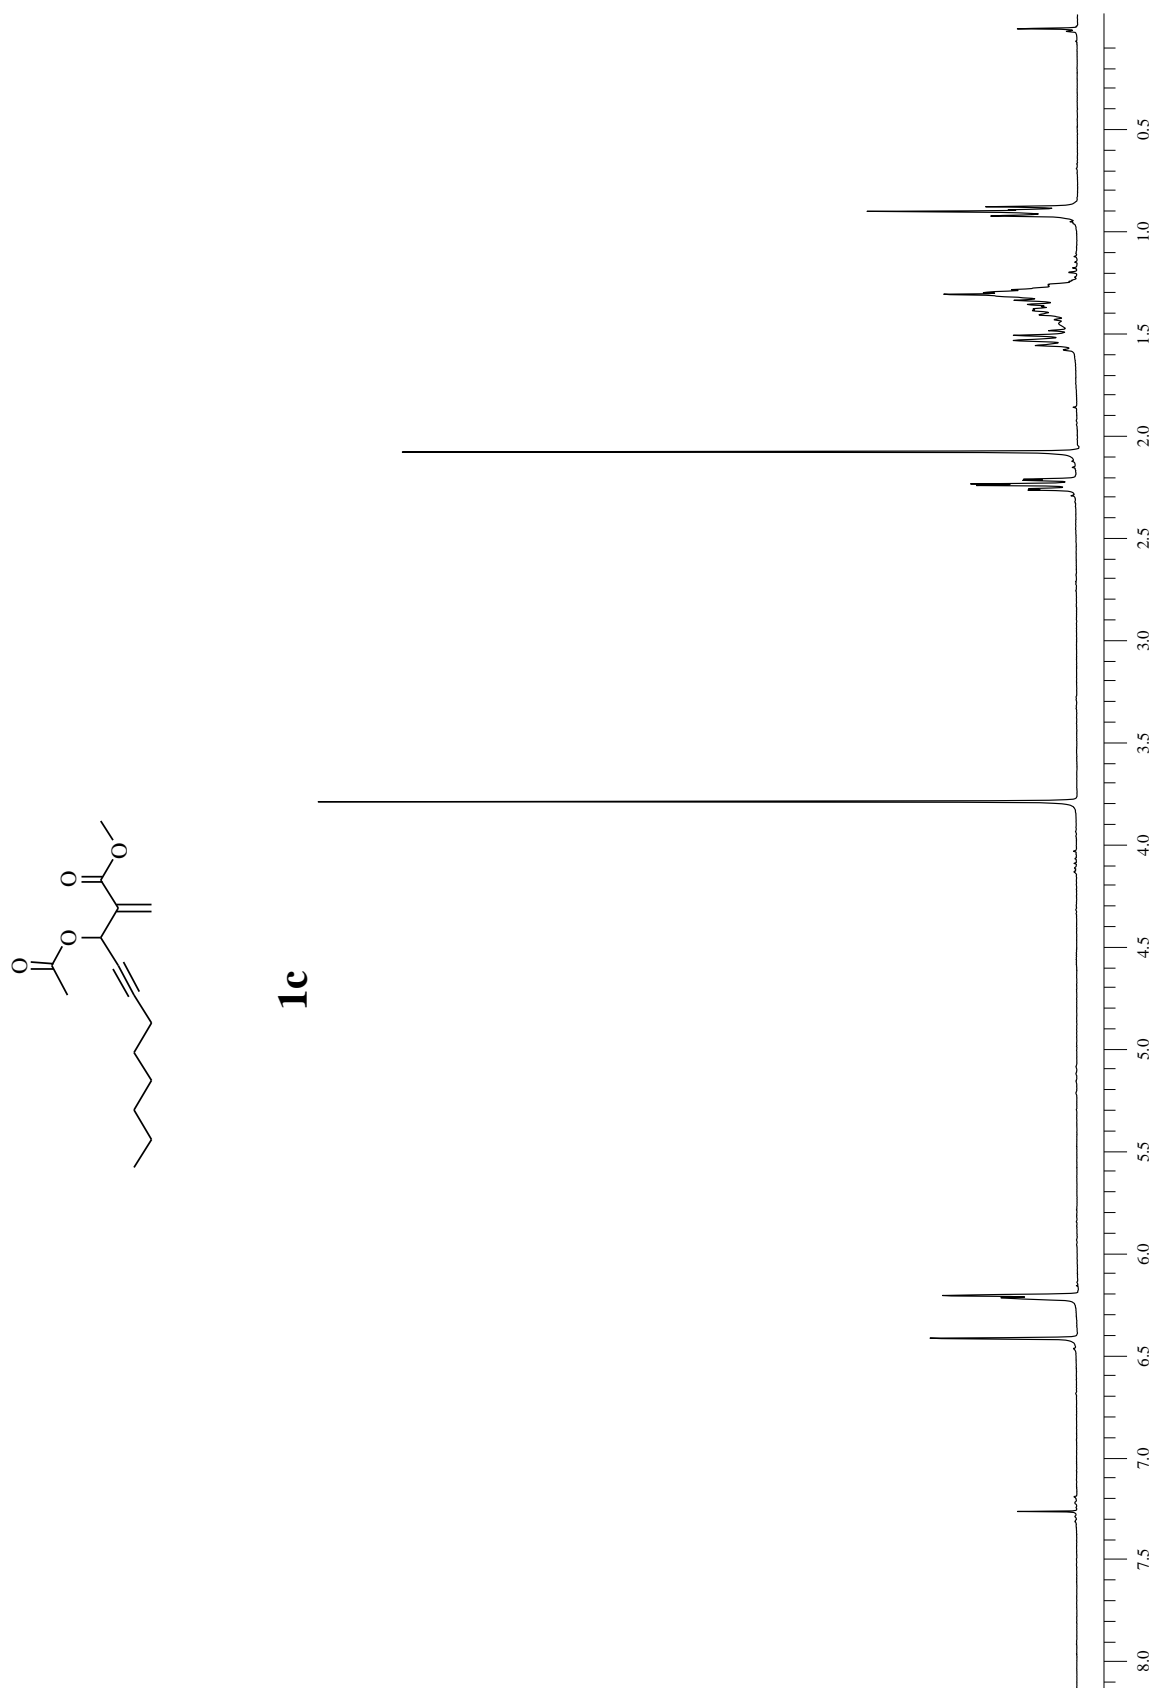

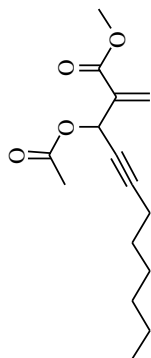

**1c**

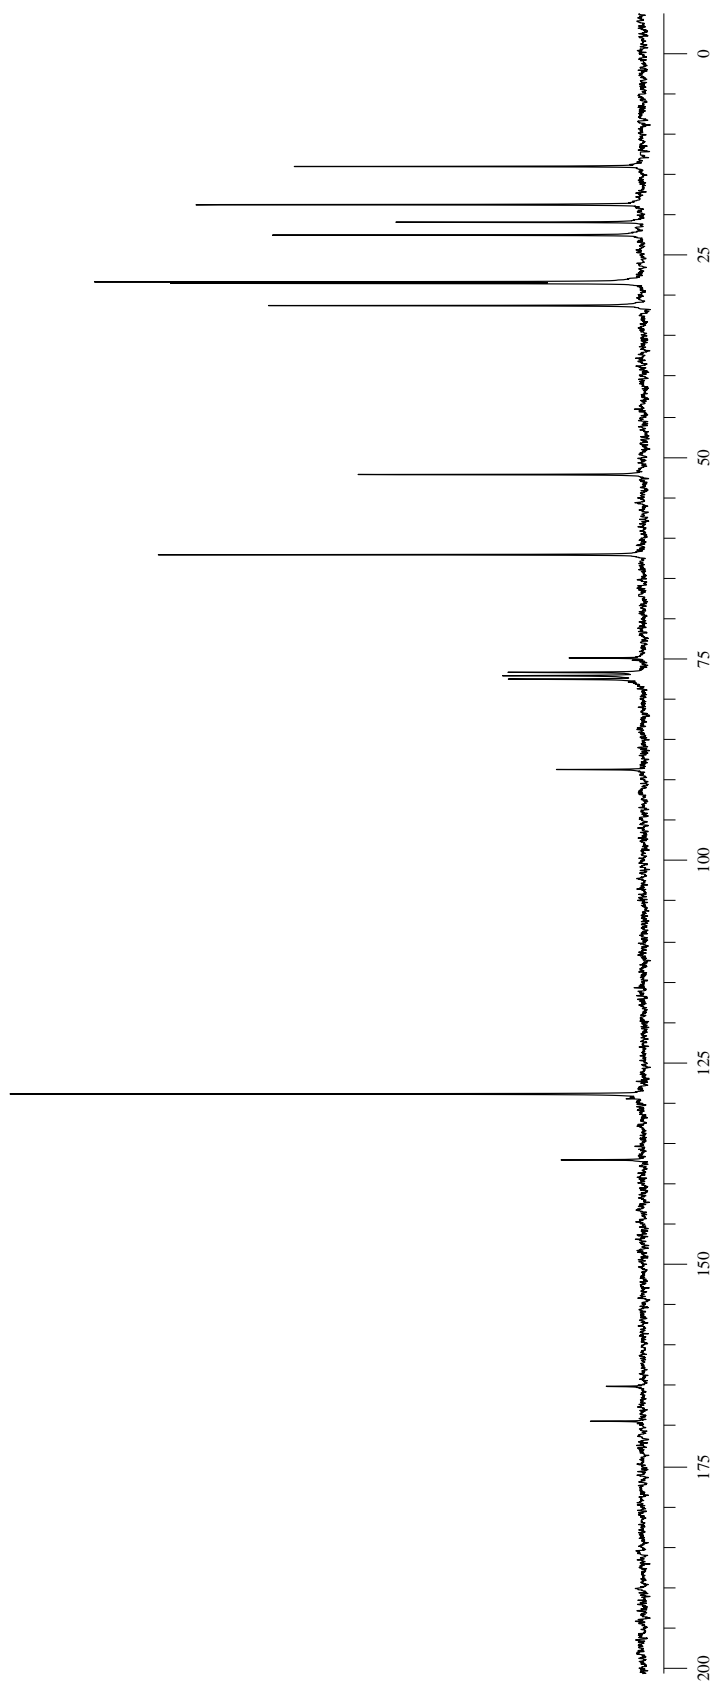

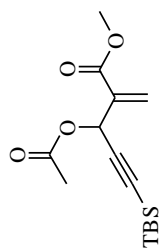

**1d**

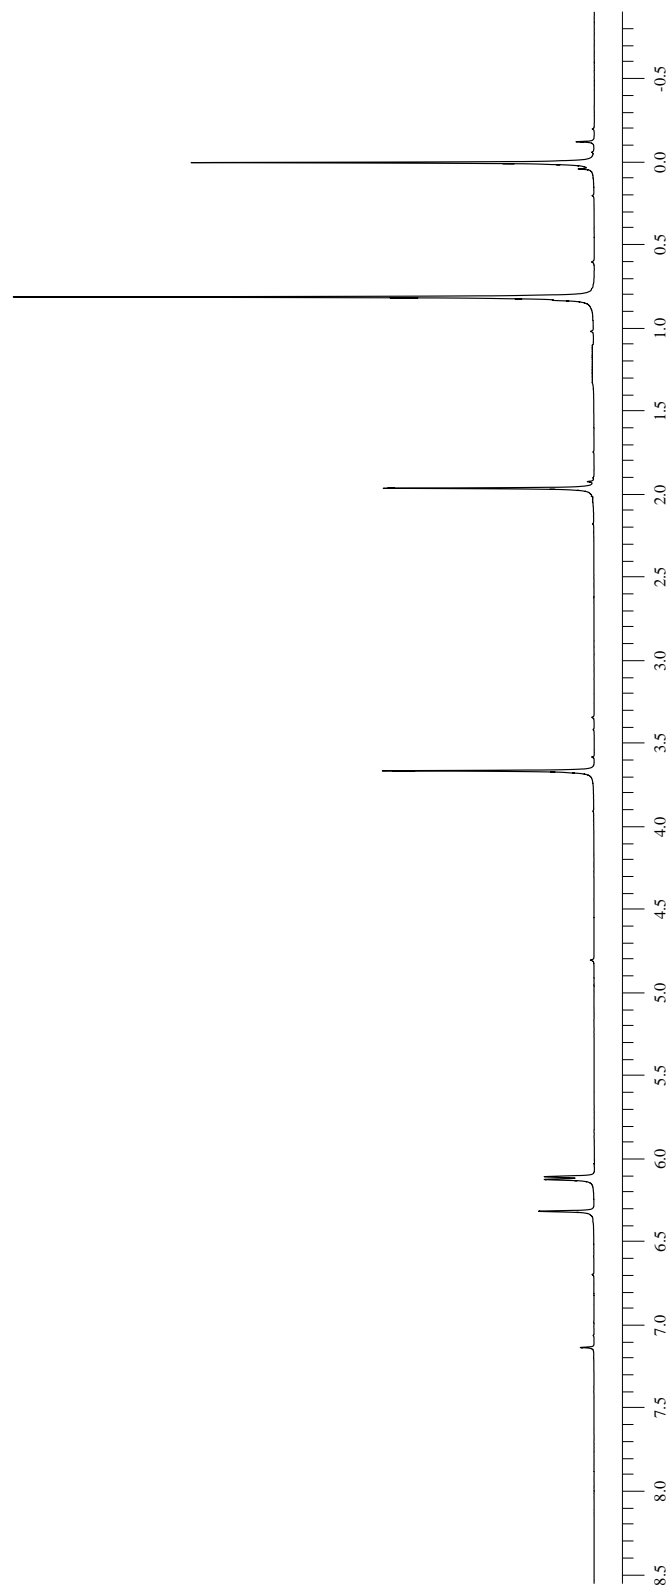

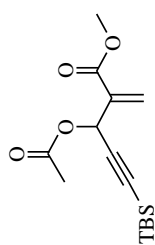

**1d**

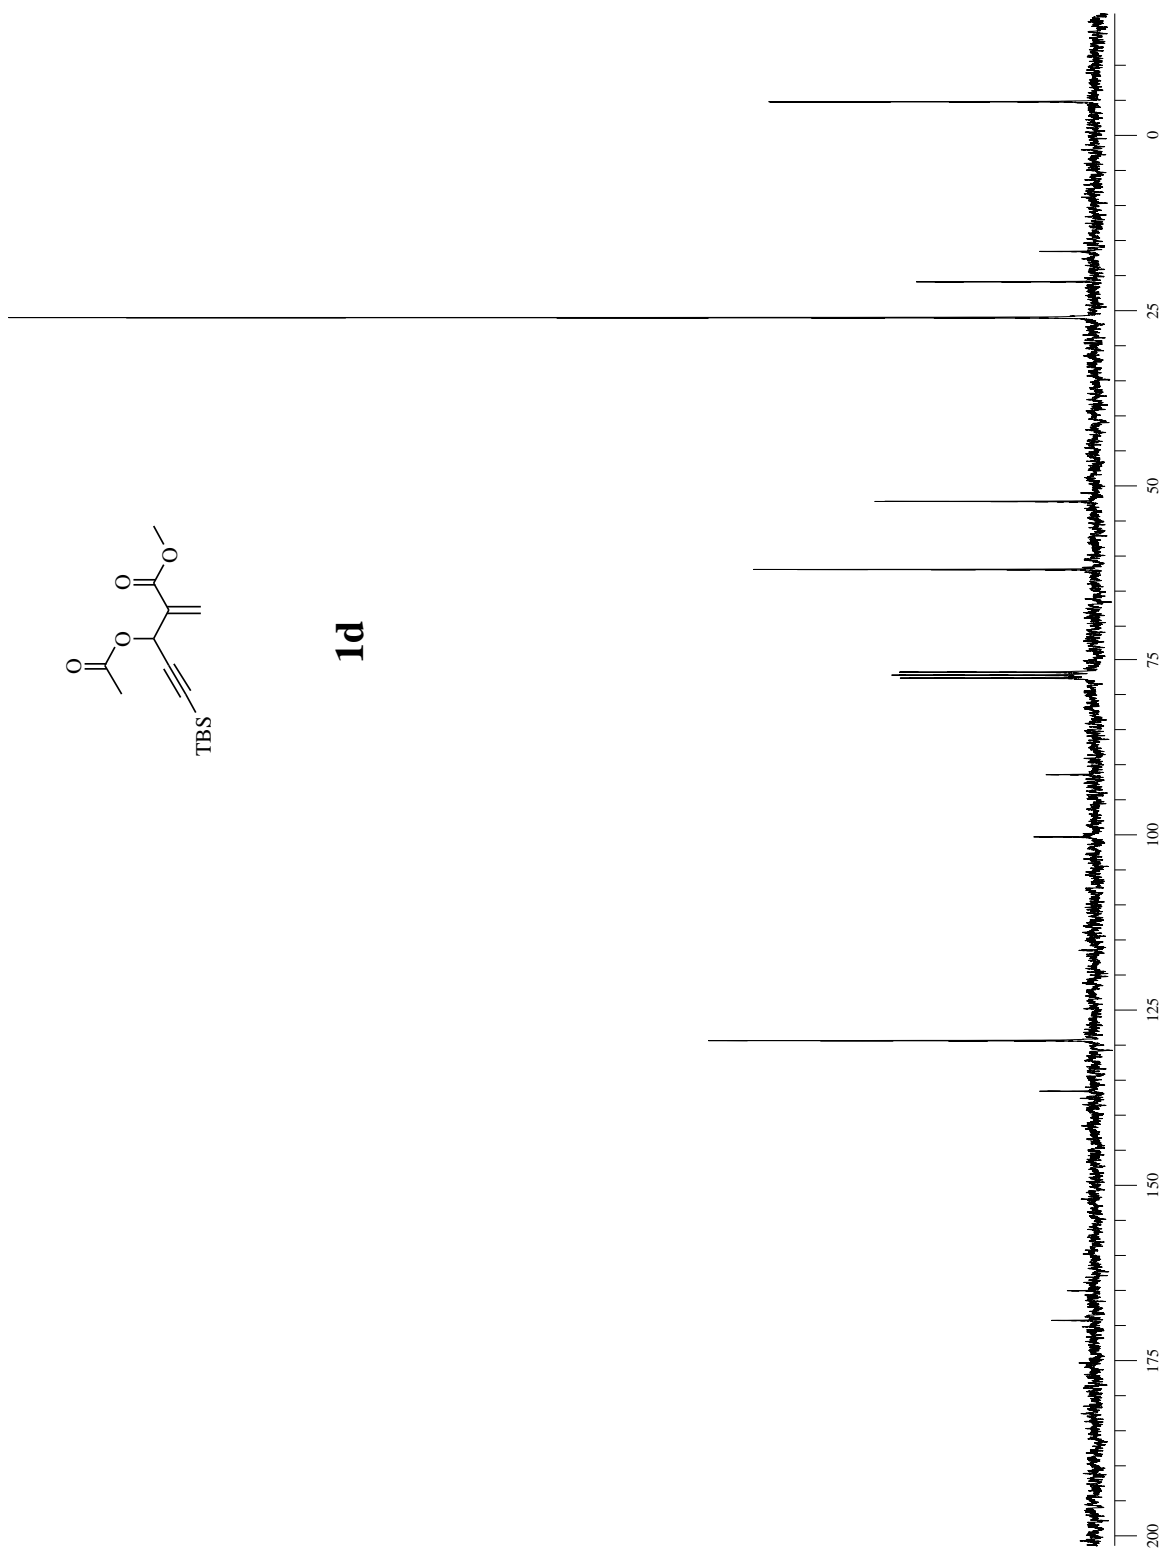

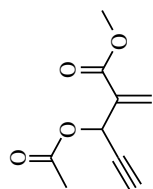

**1e**

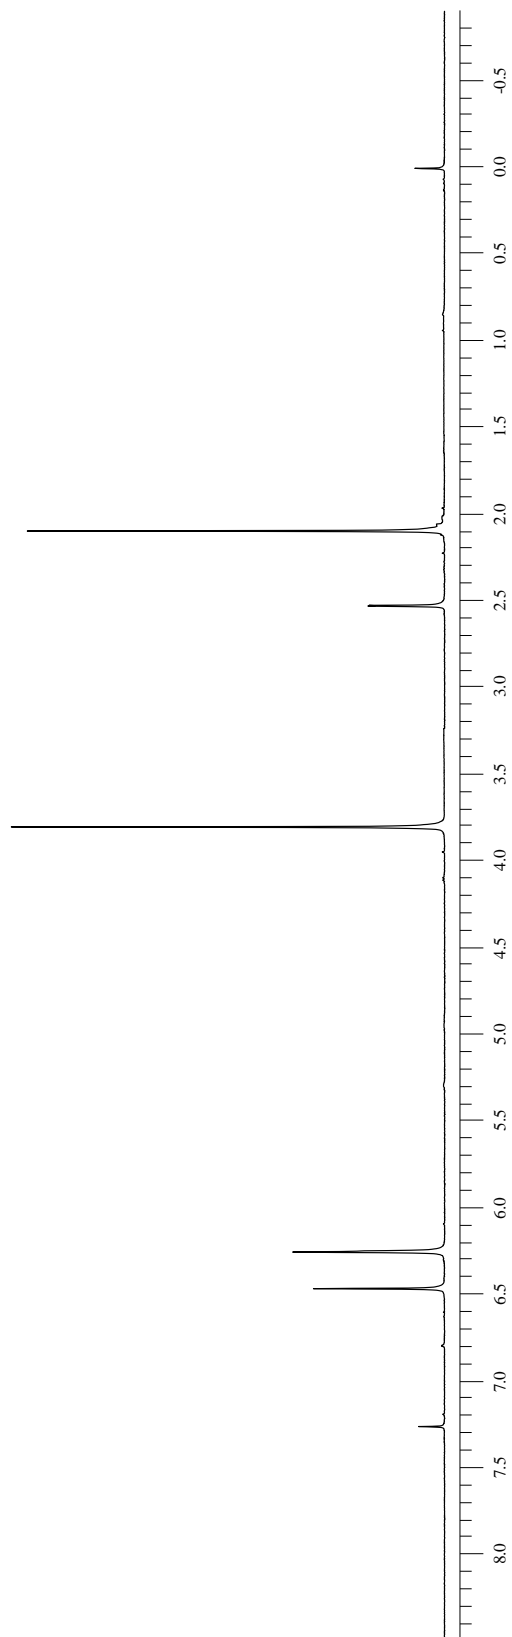

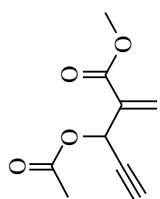

**1e**

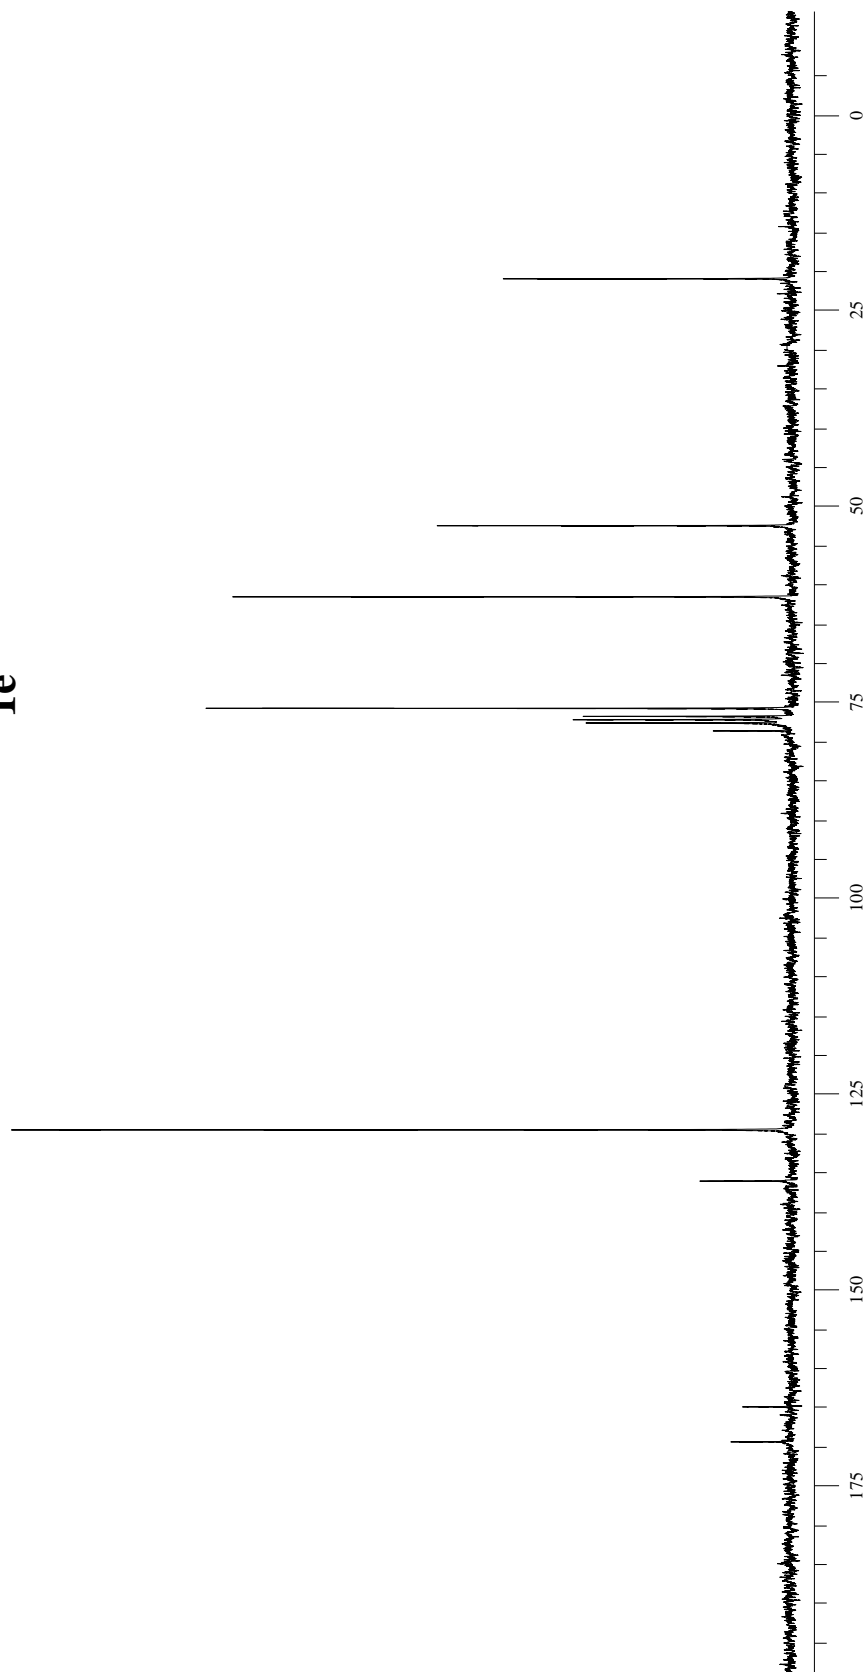

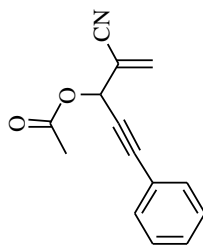

**1h**

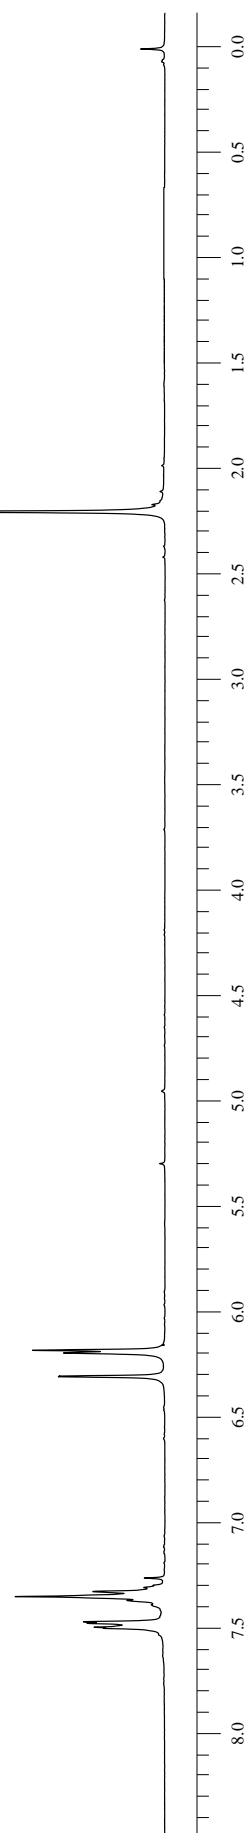



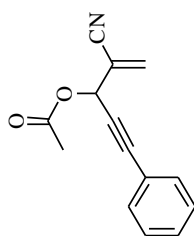

**1h**

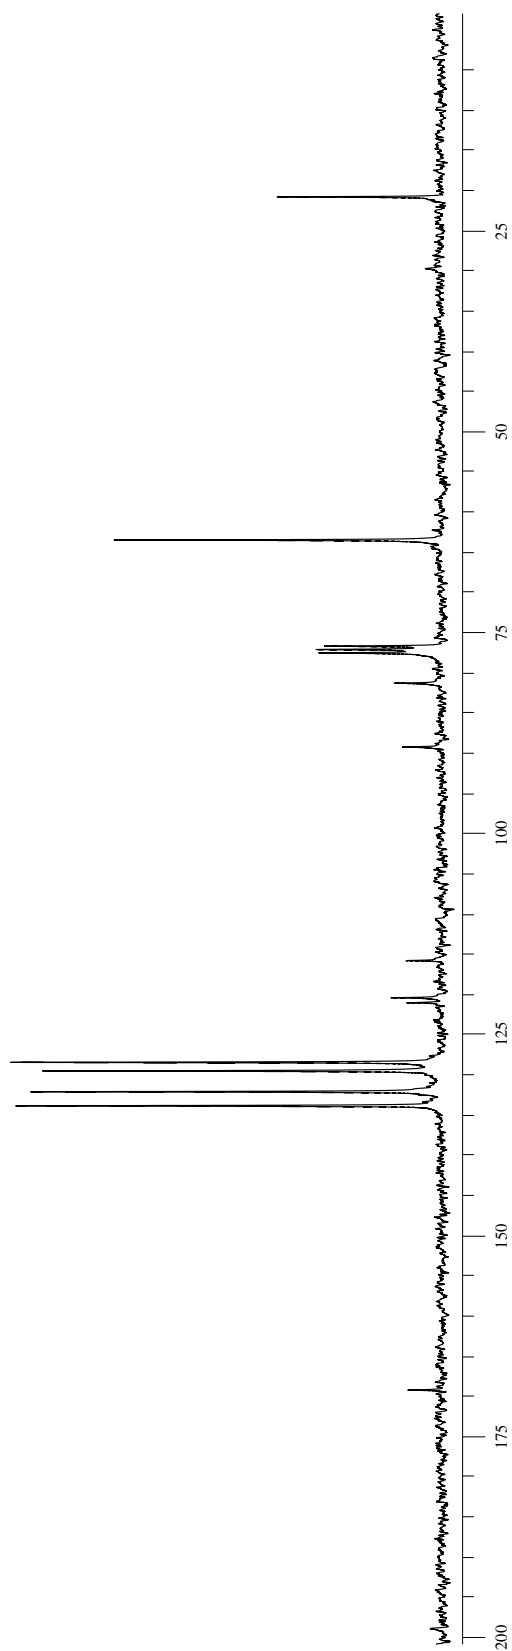

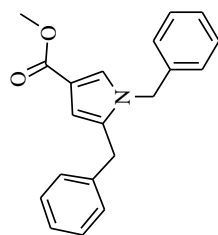

**3a**

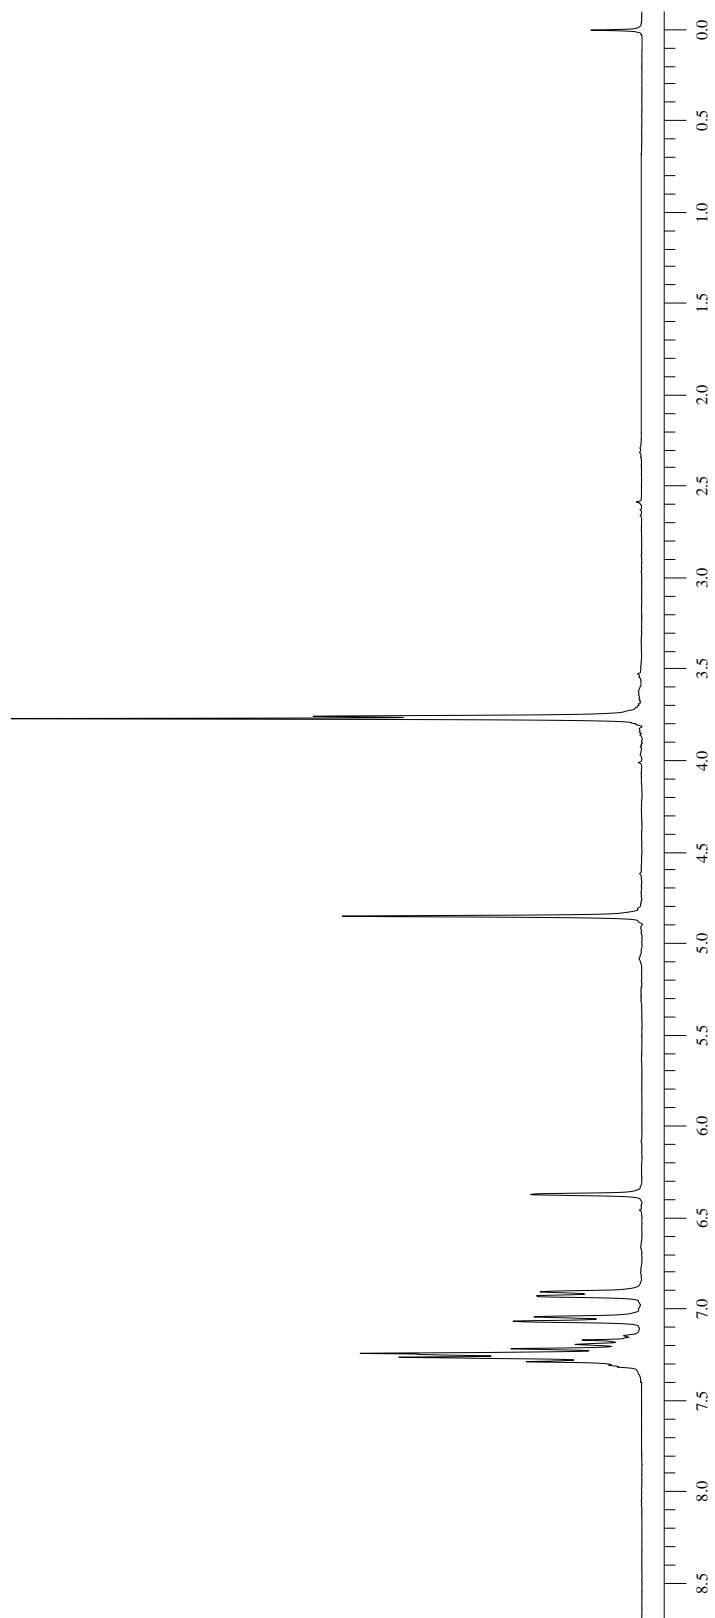

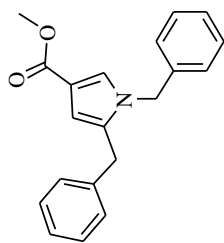

**3a**

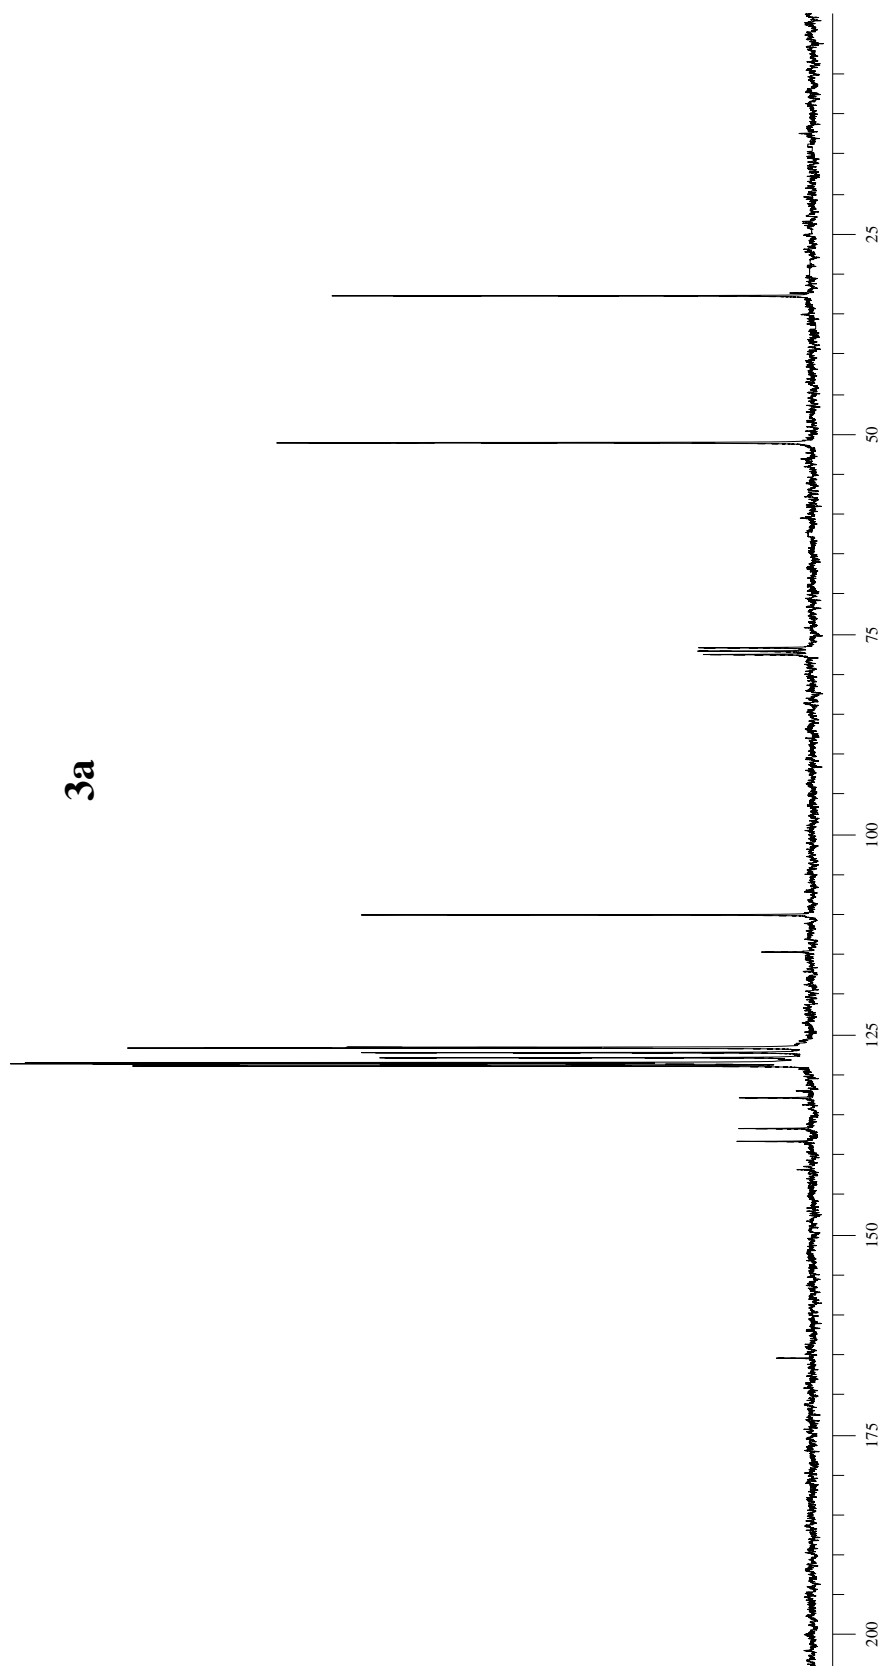



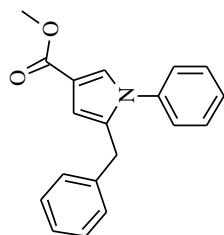

**3b**

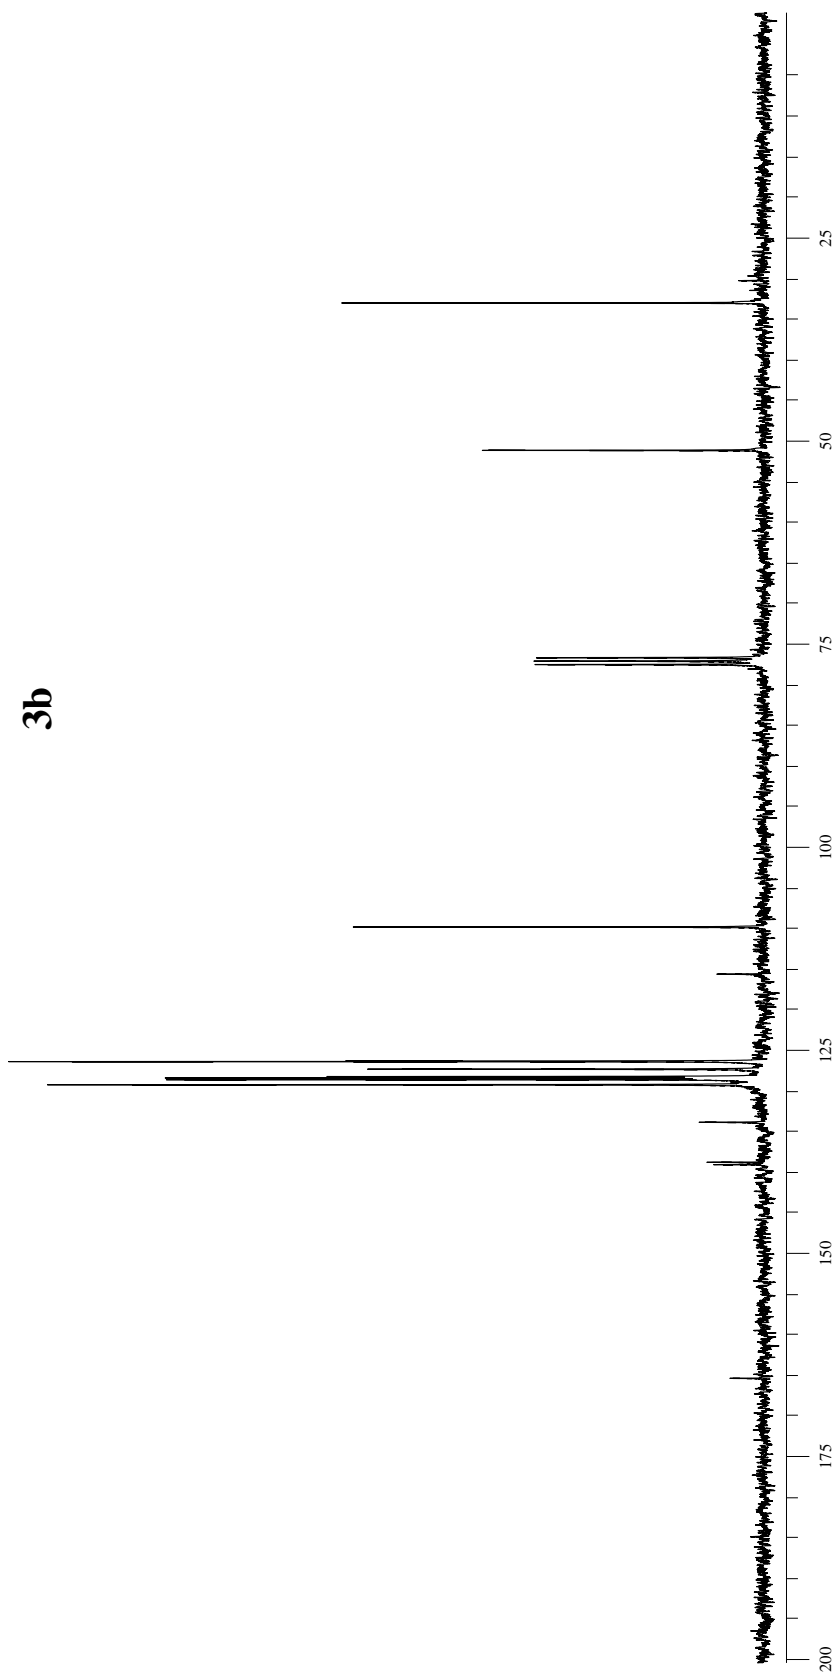

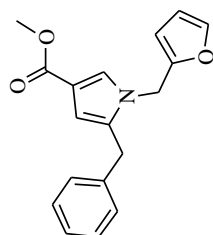

**3c**

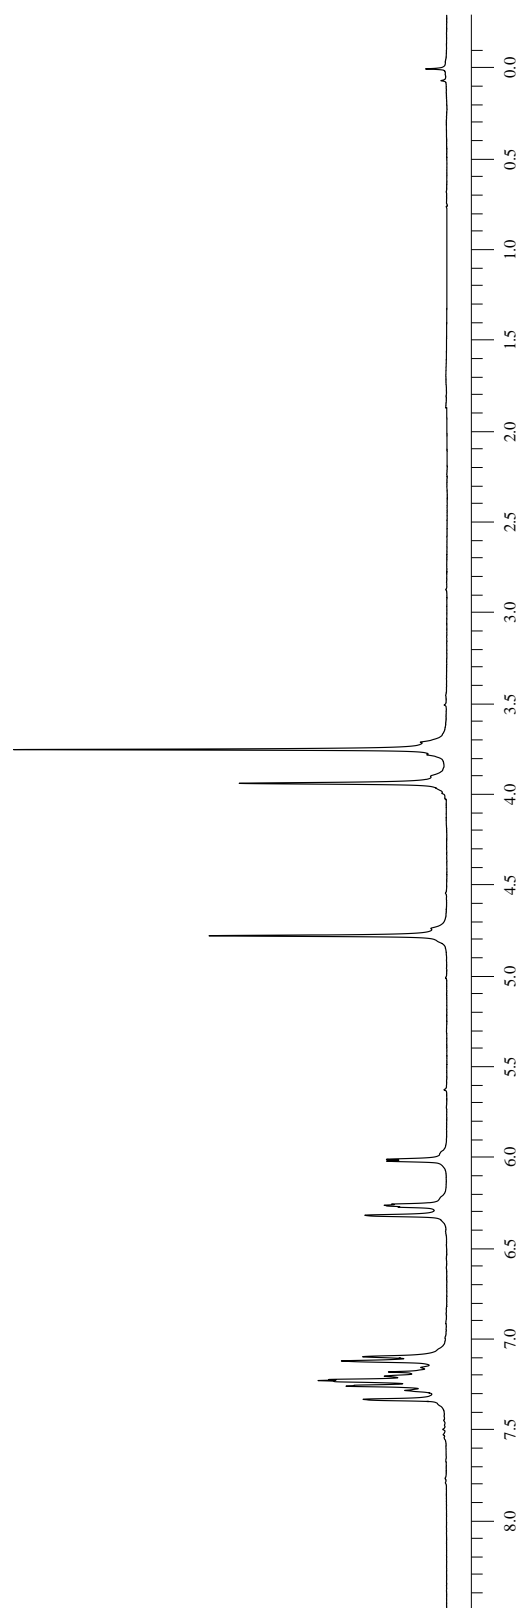

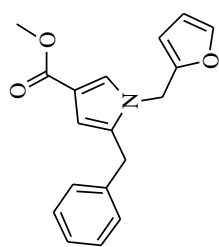

**3c**

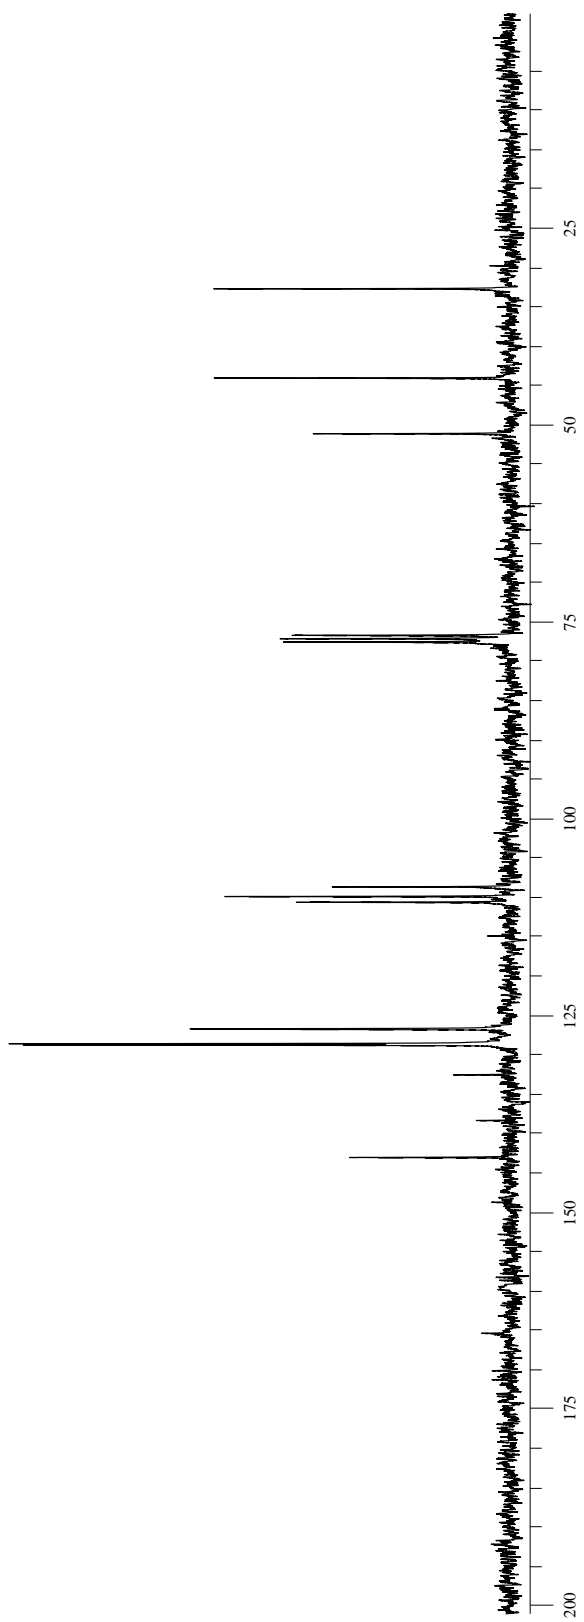

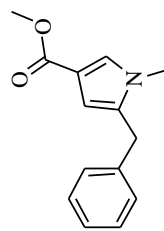

**3d**

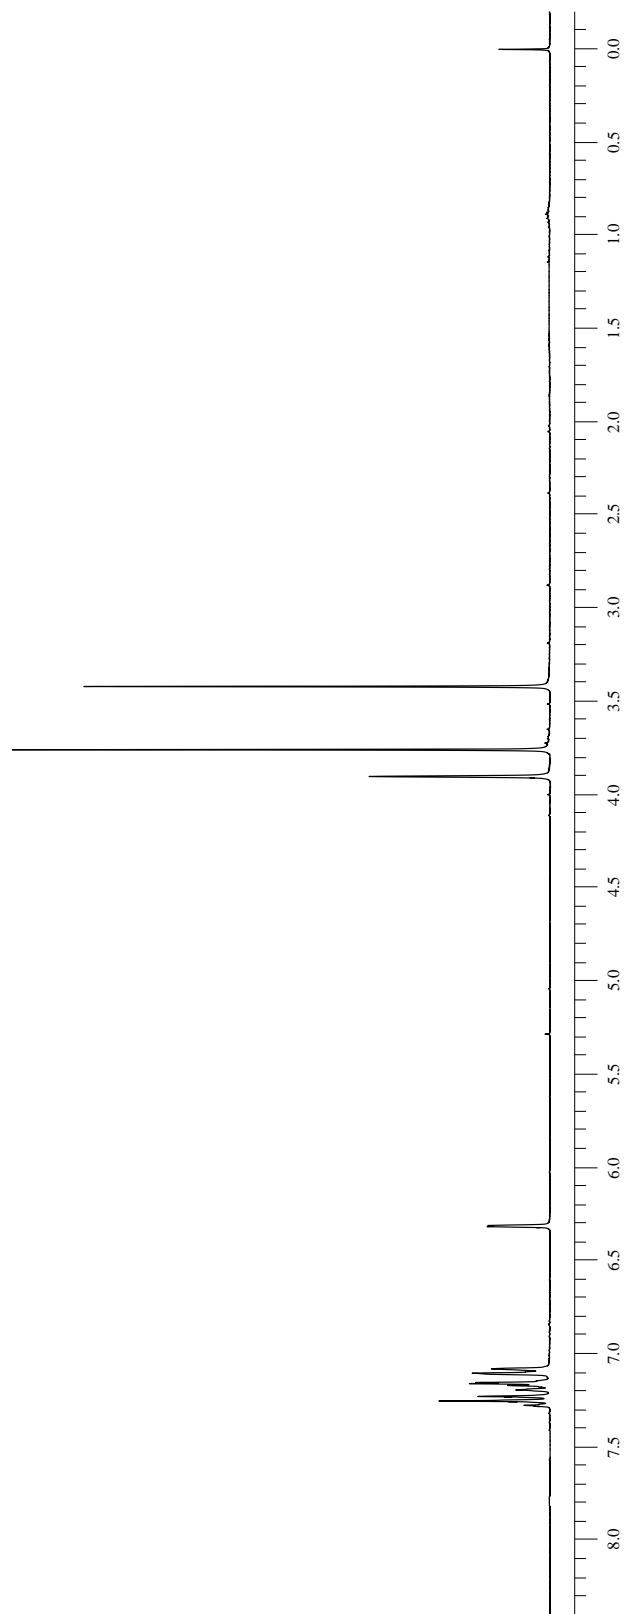



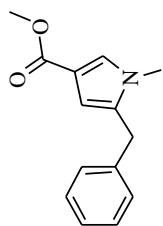

**3d**

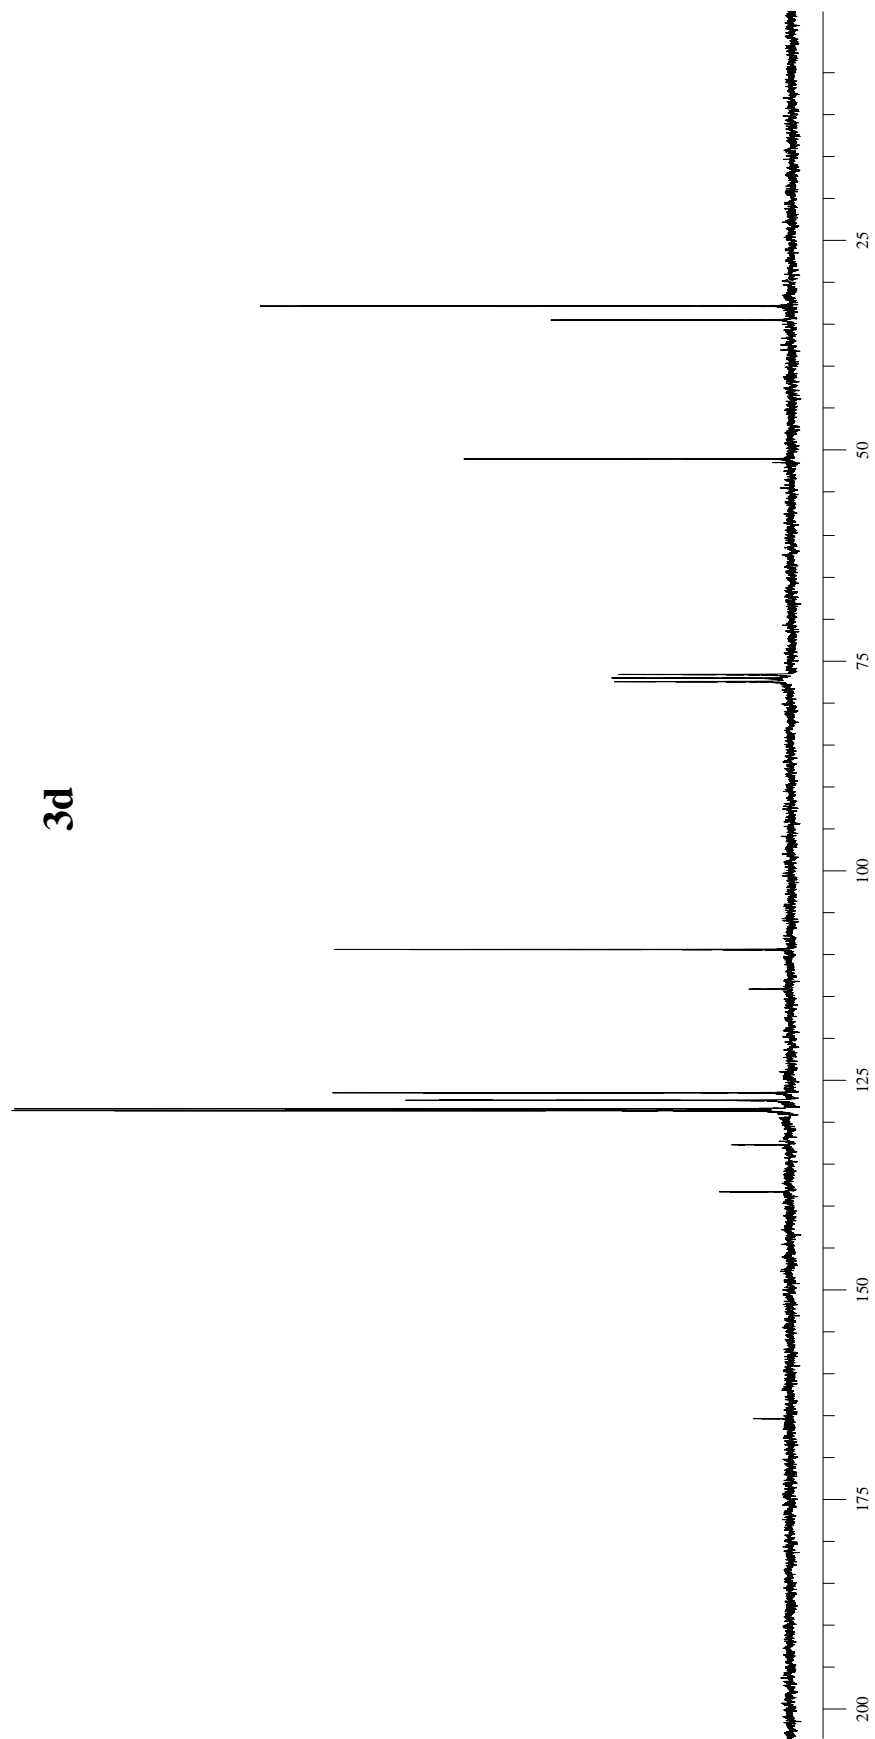

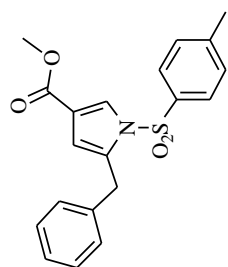

**3e**

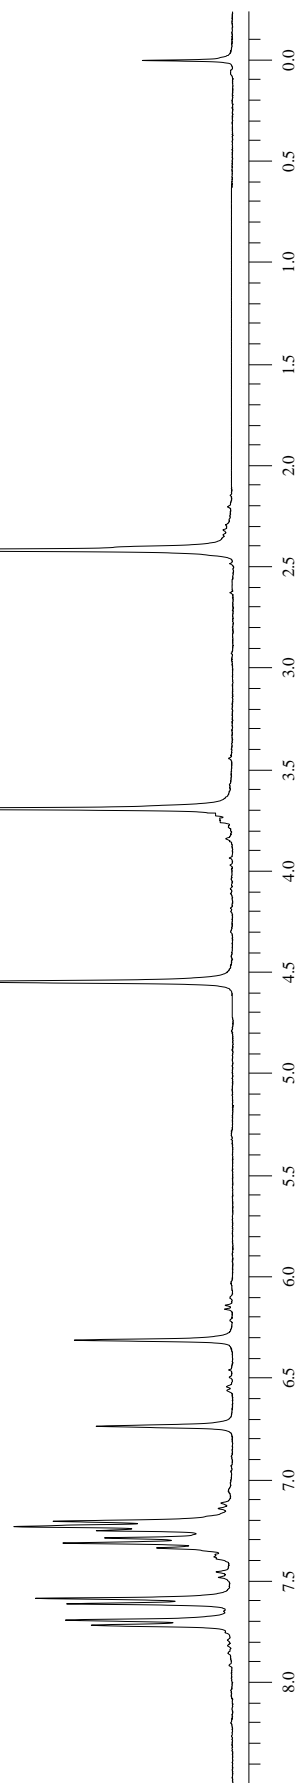

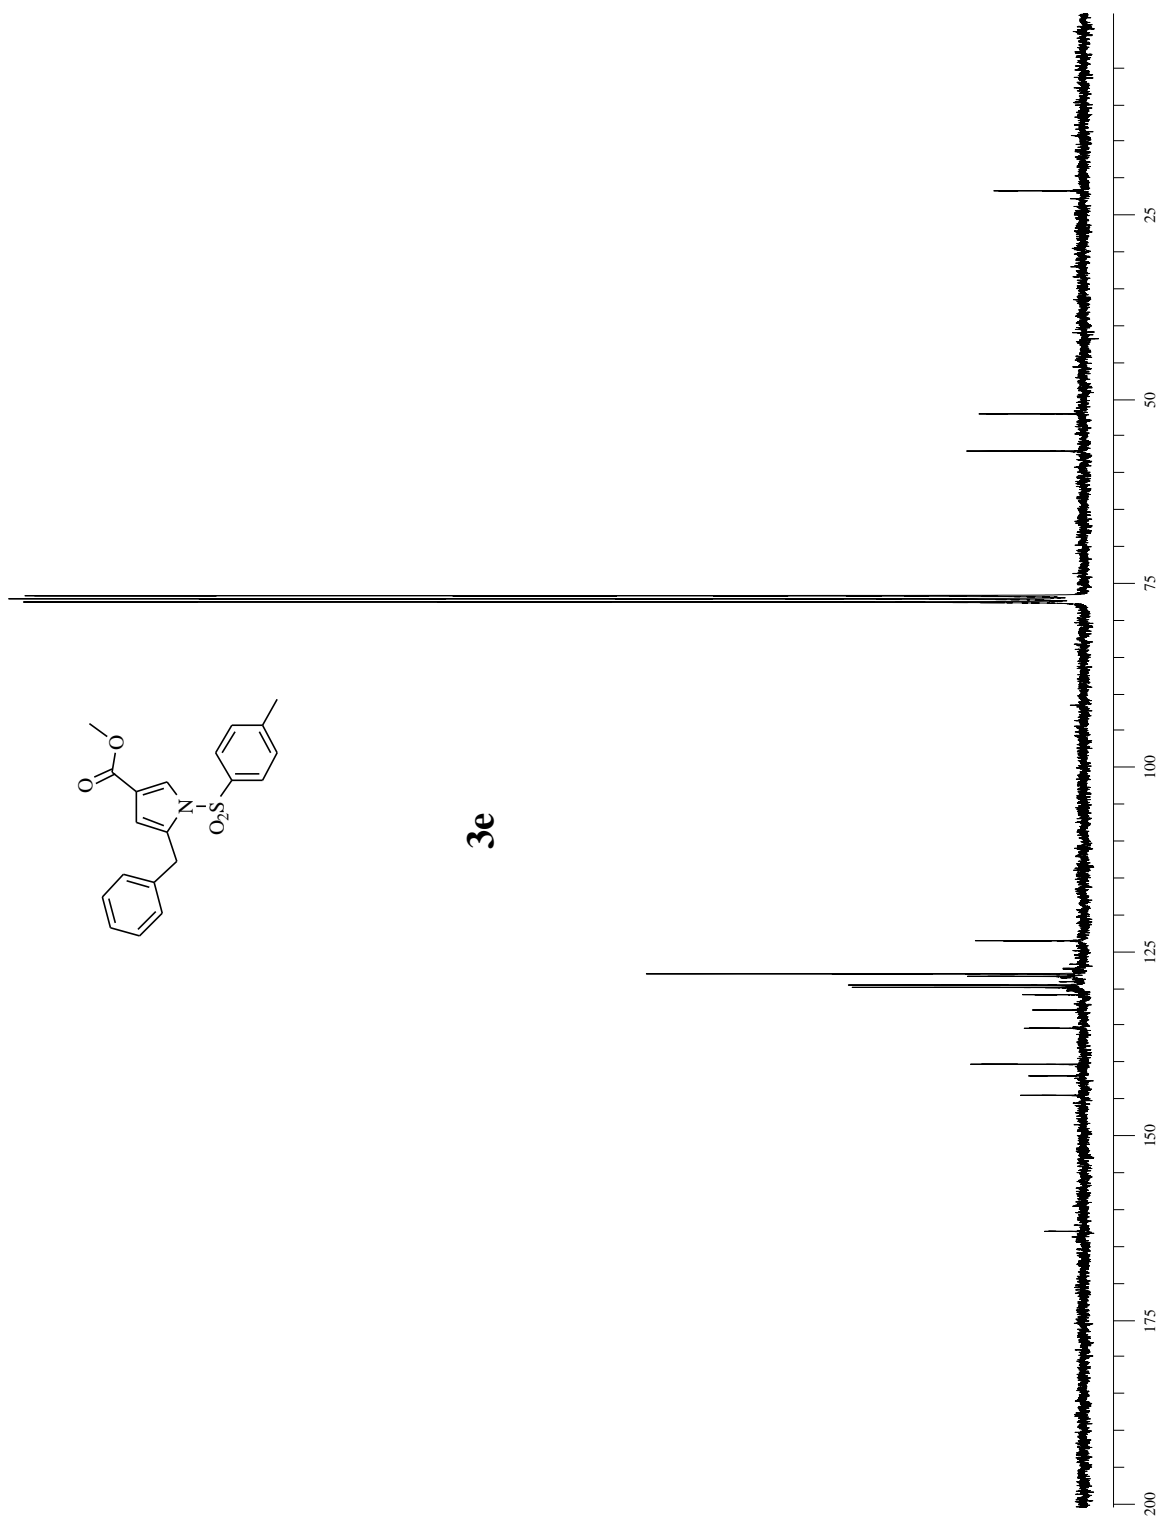

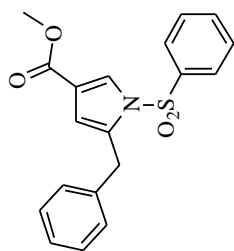

**3f**

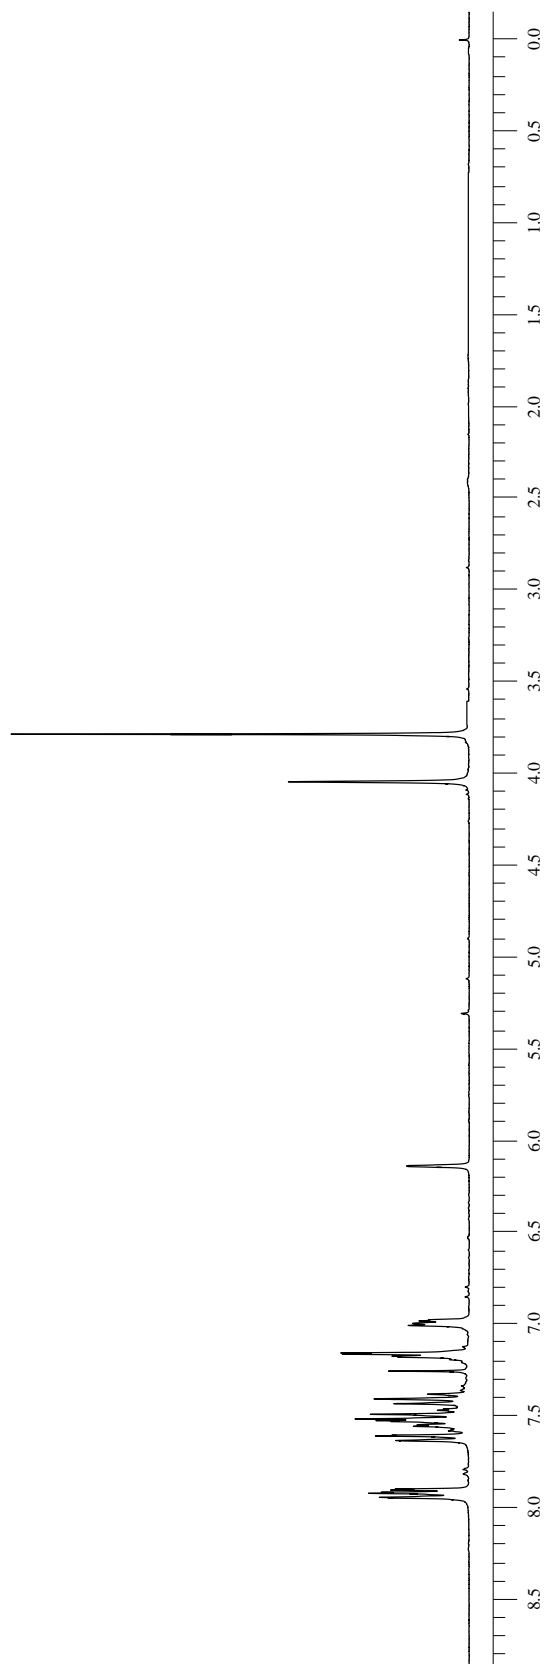

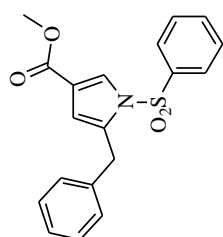

**3f**

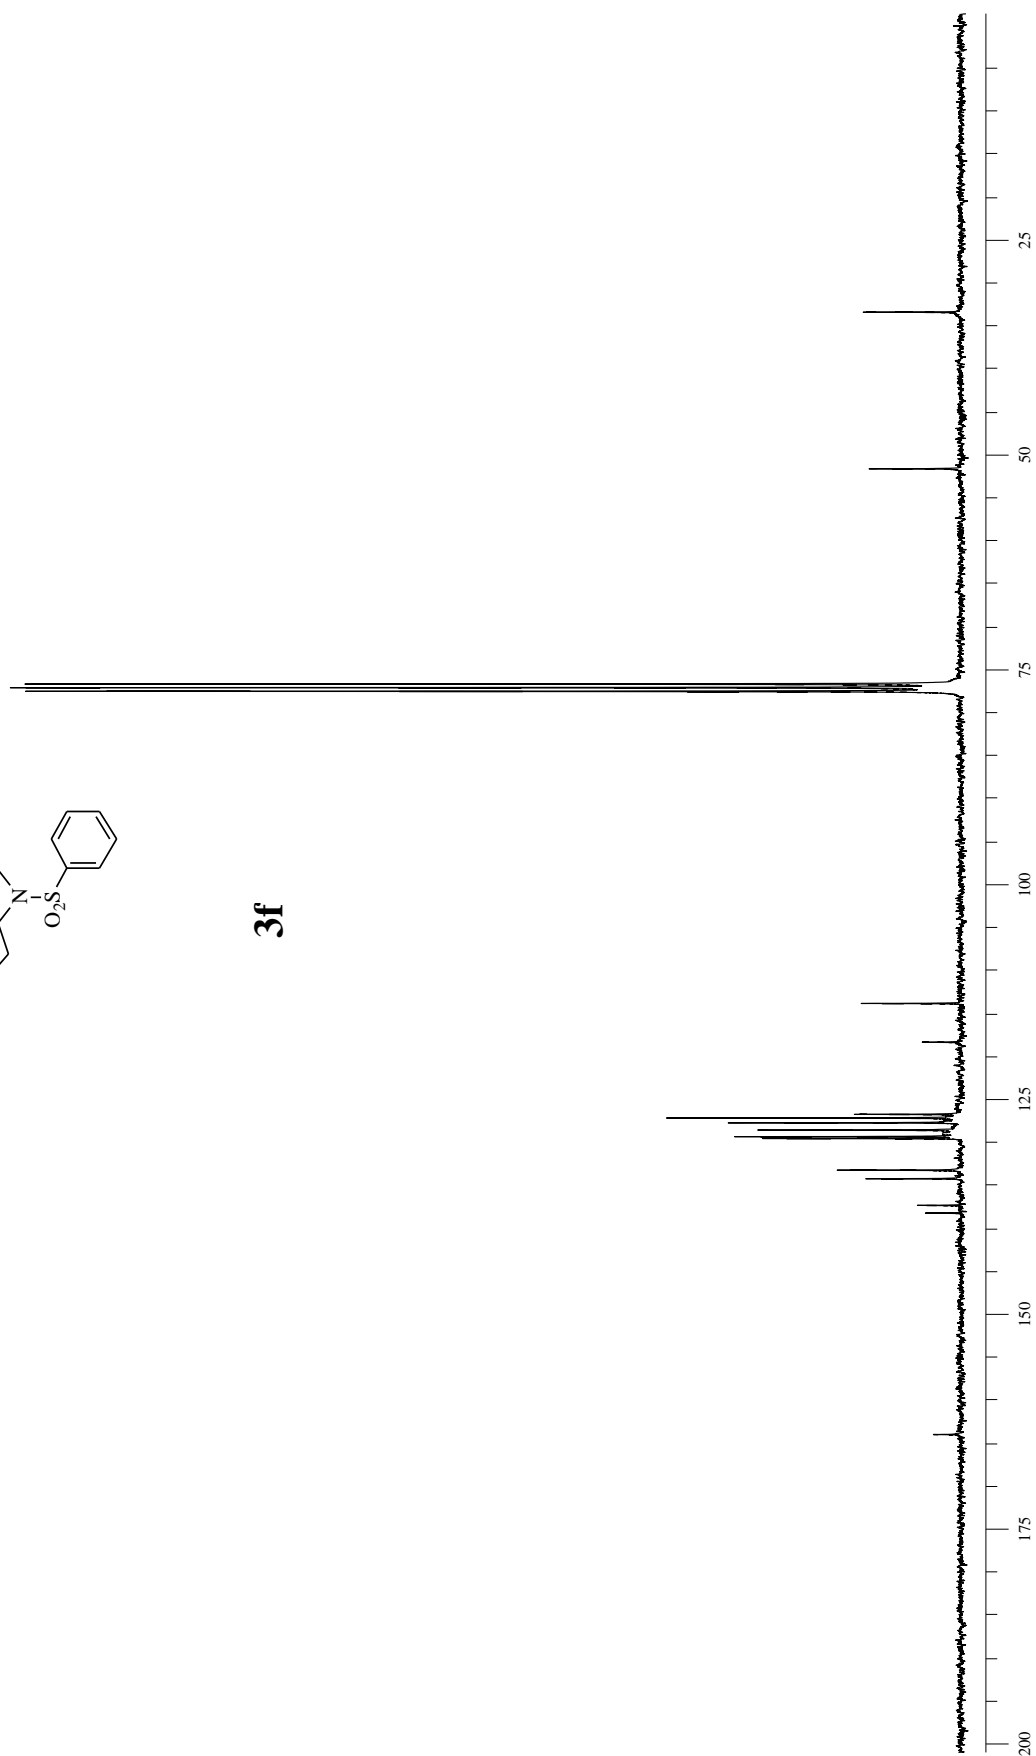

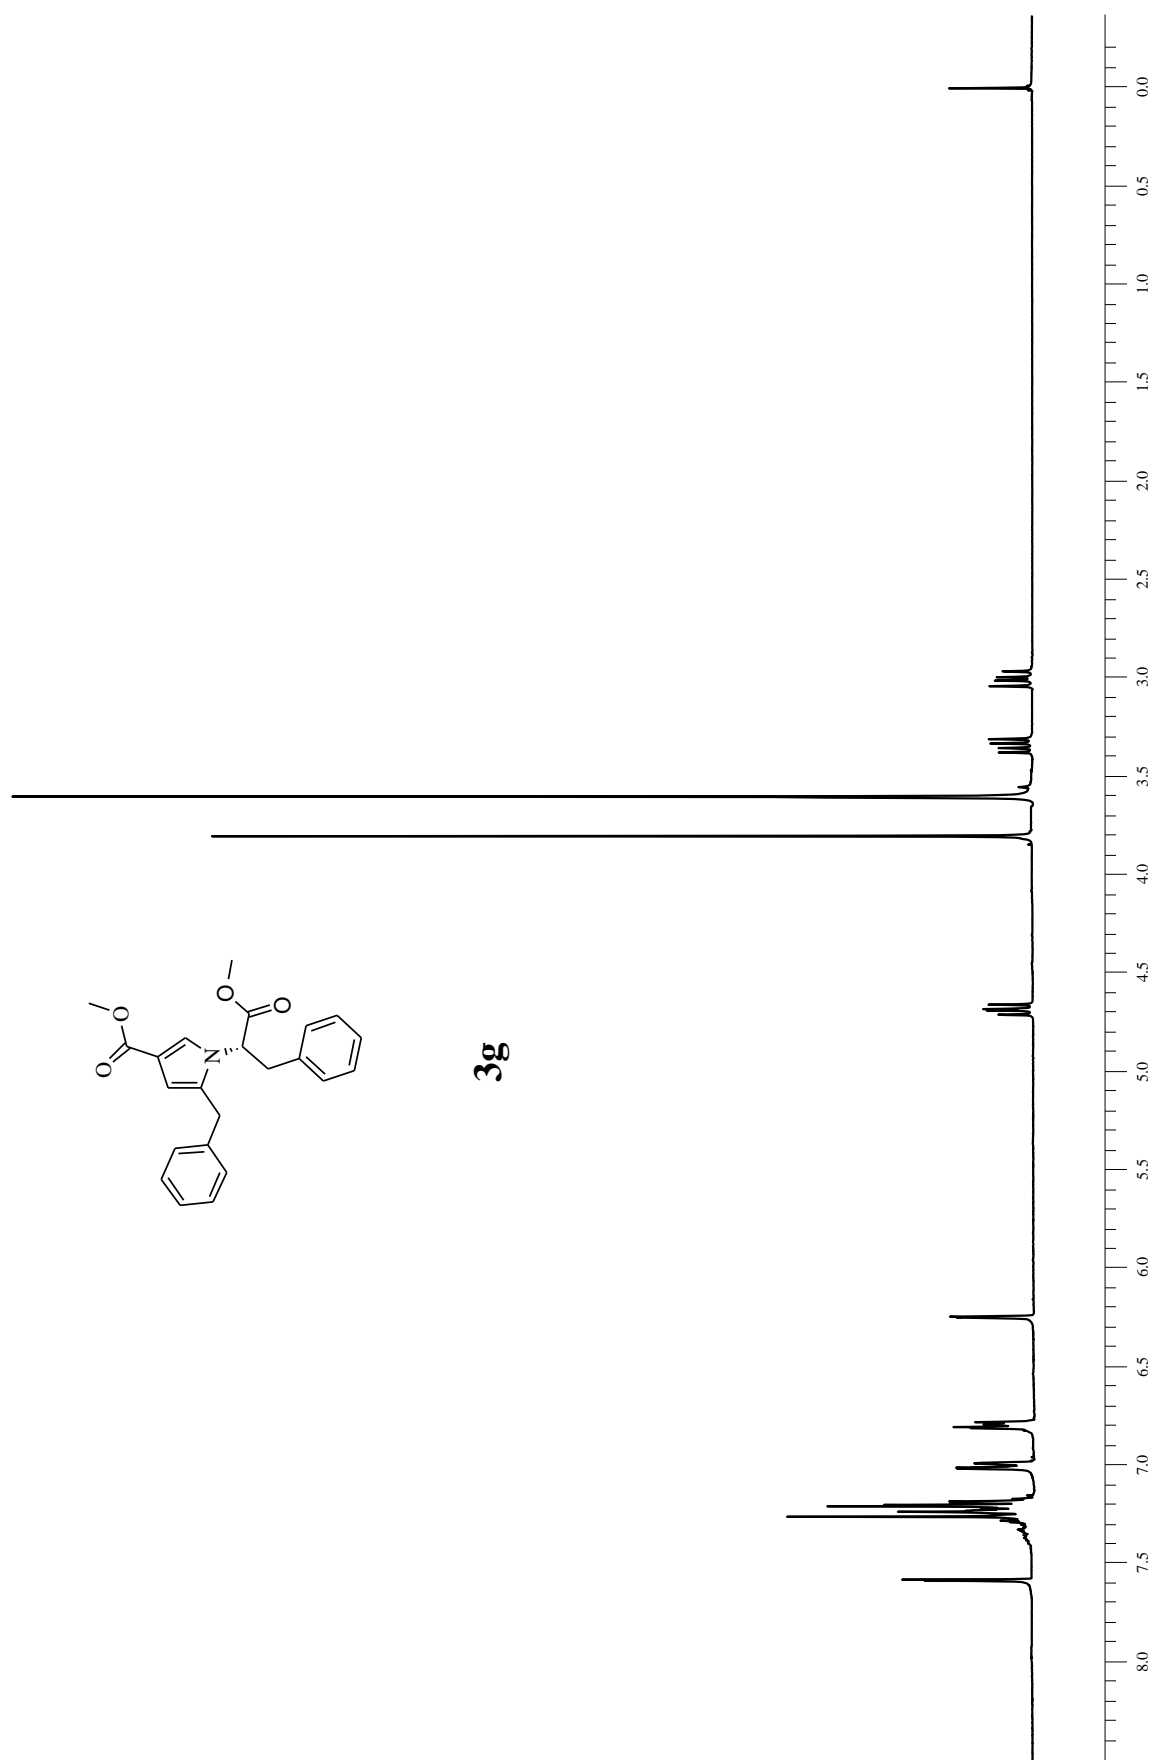

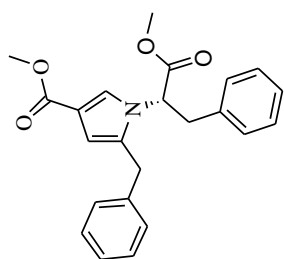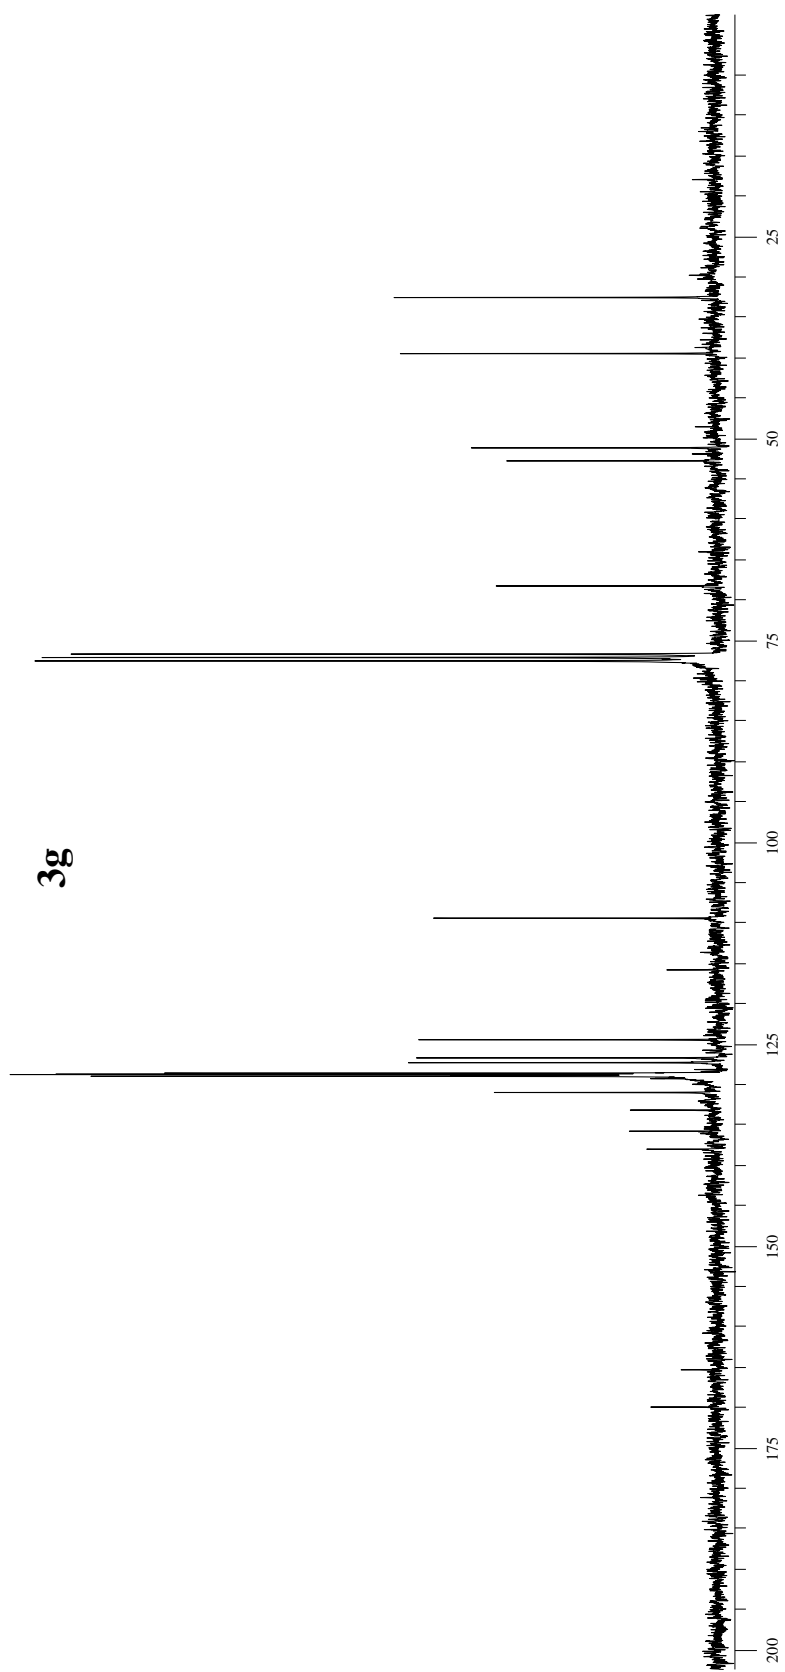

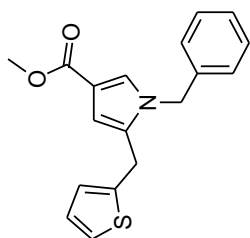

**3h**

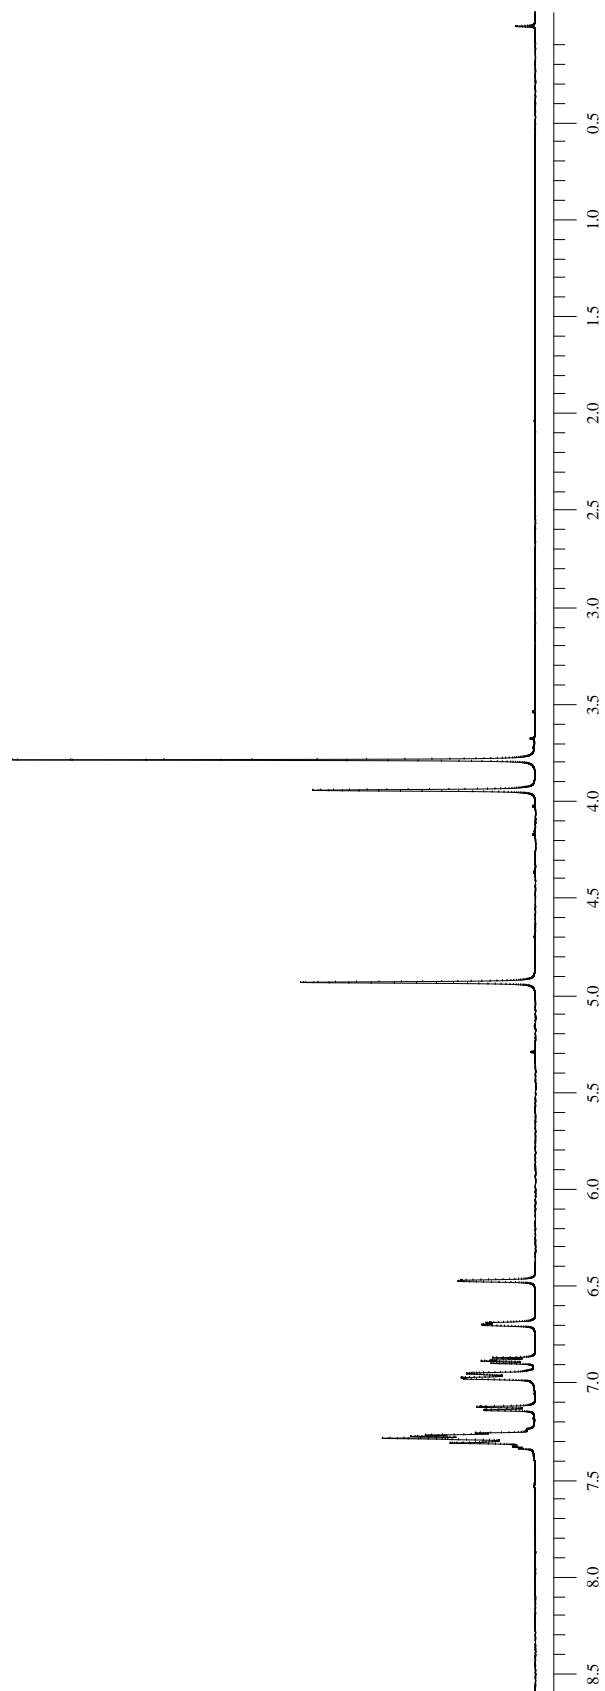



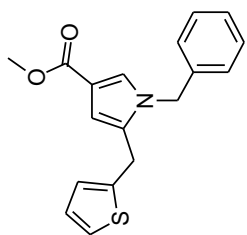

**3h**

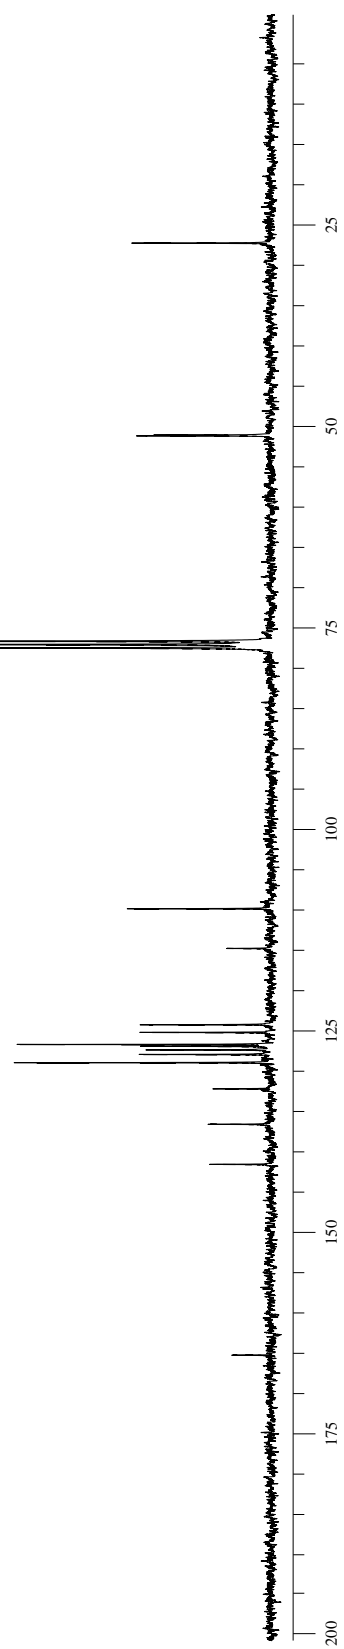

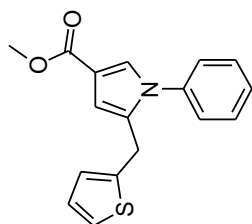

3i

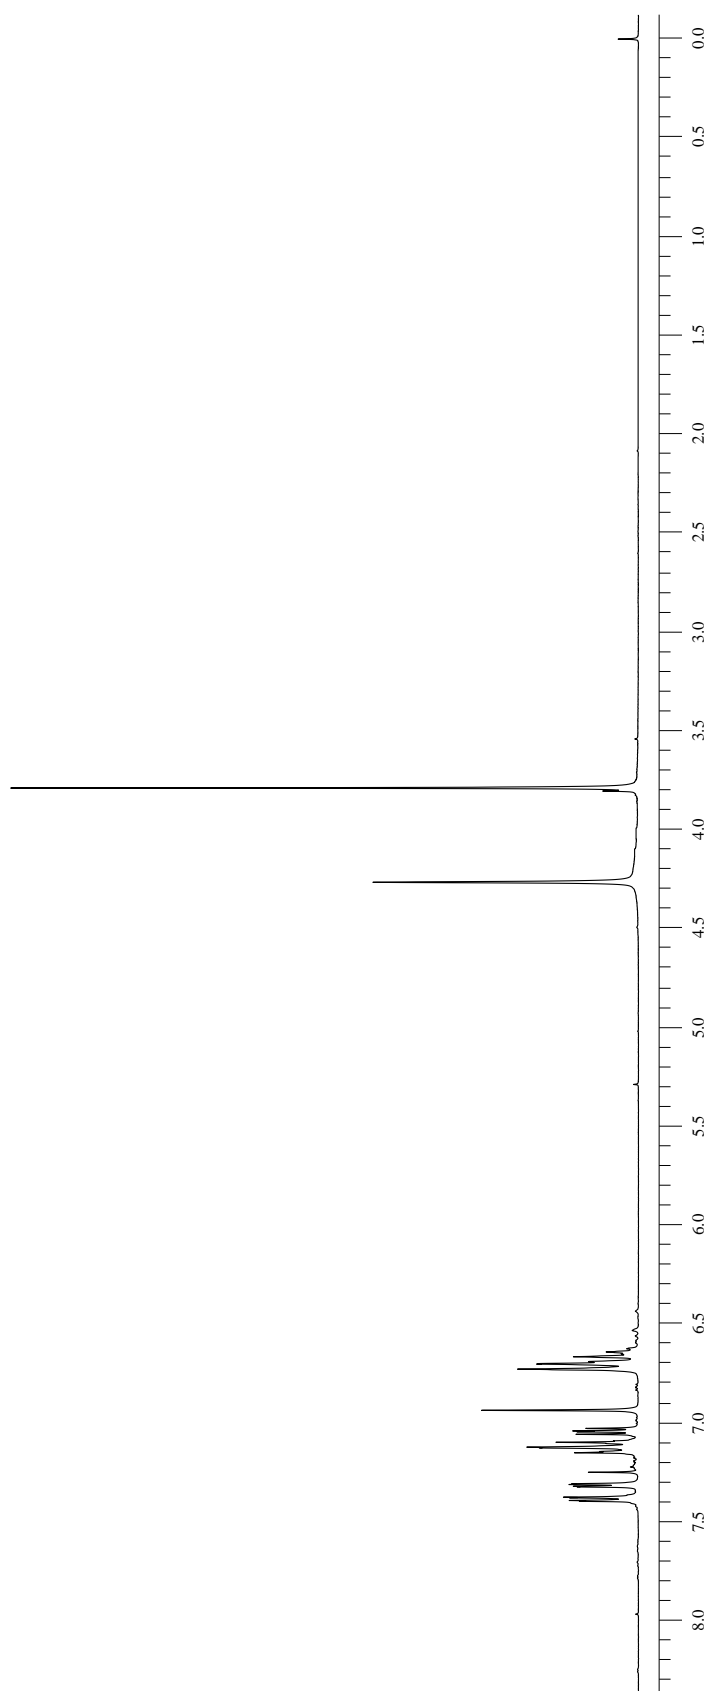

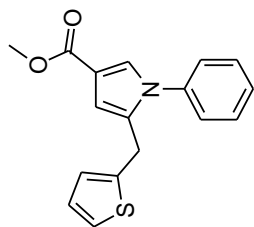

**3i**

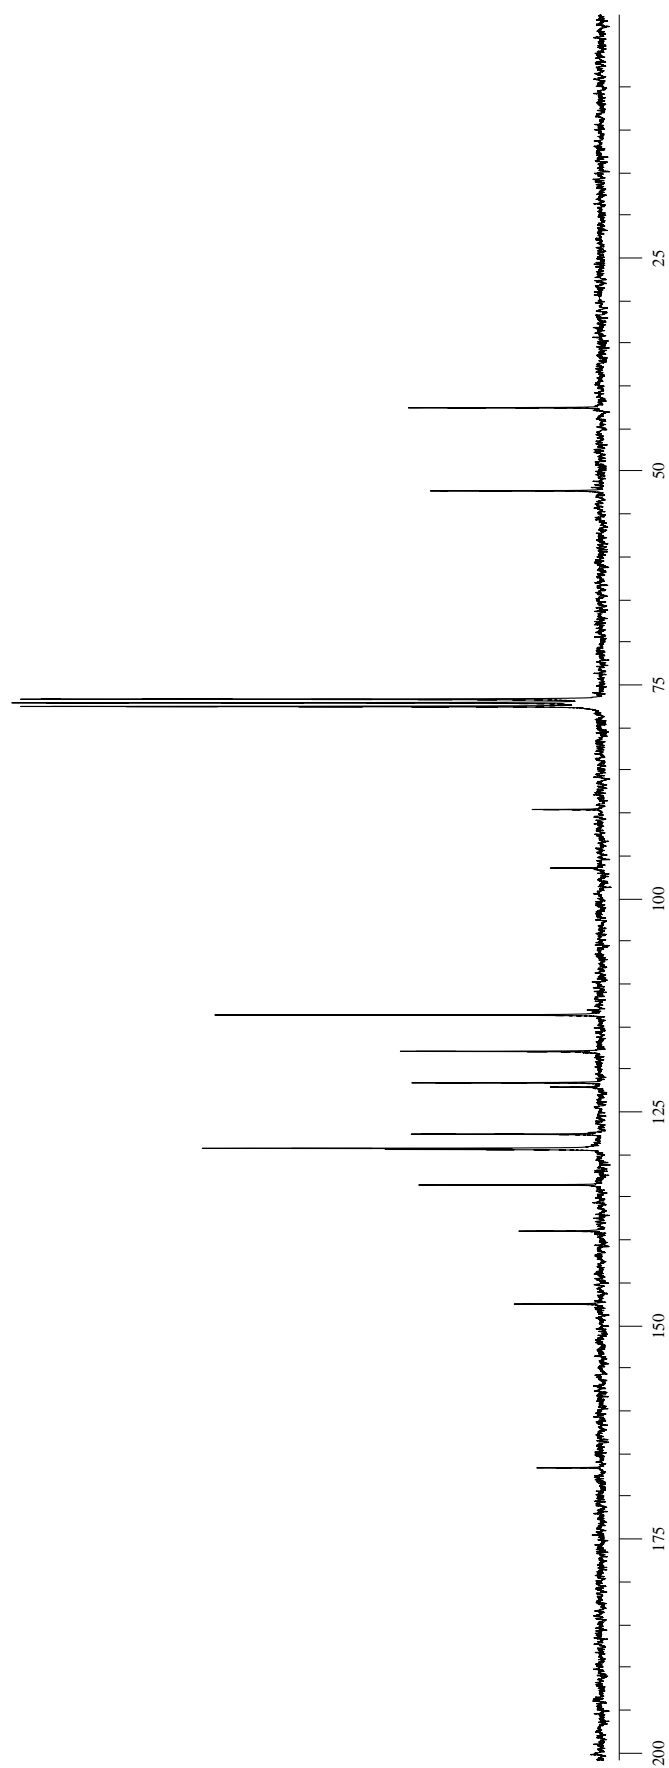

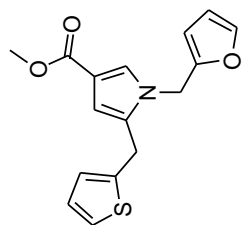

3j

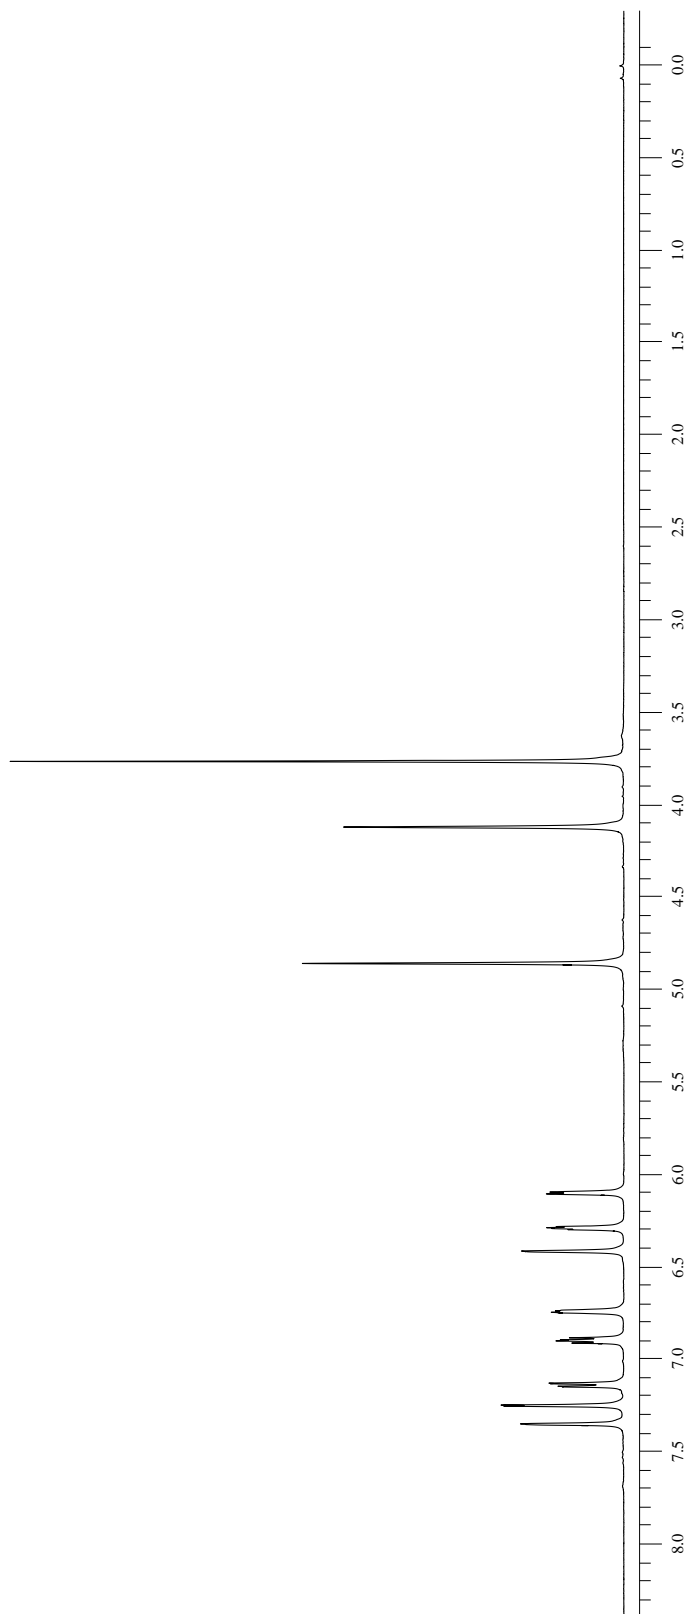

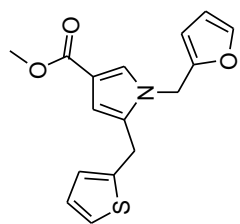

3j

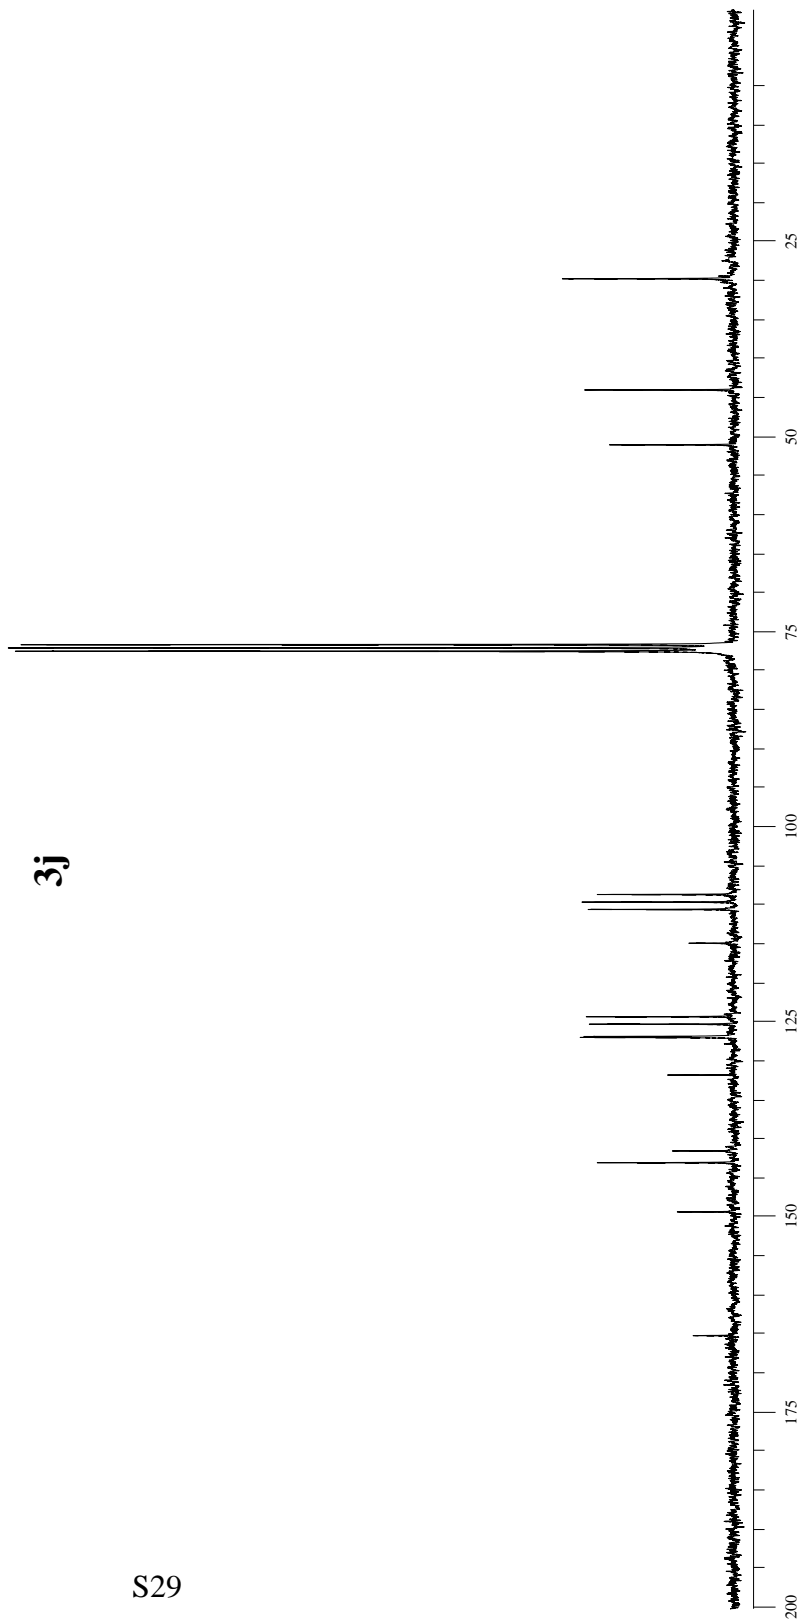

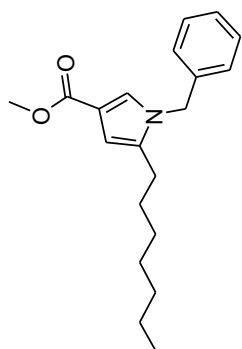

**3k**

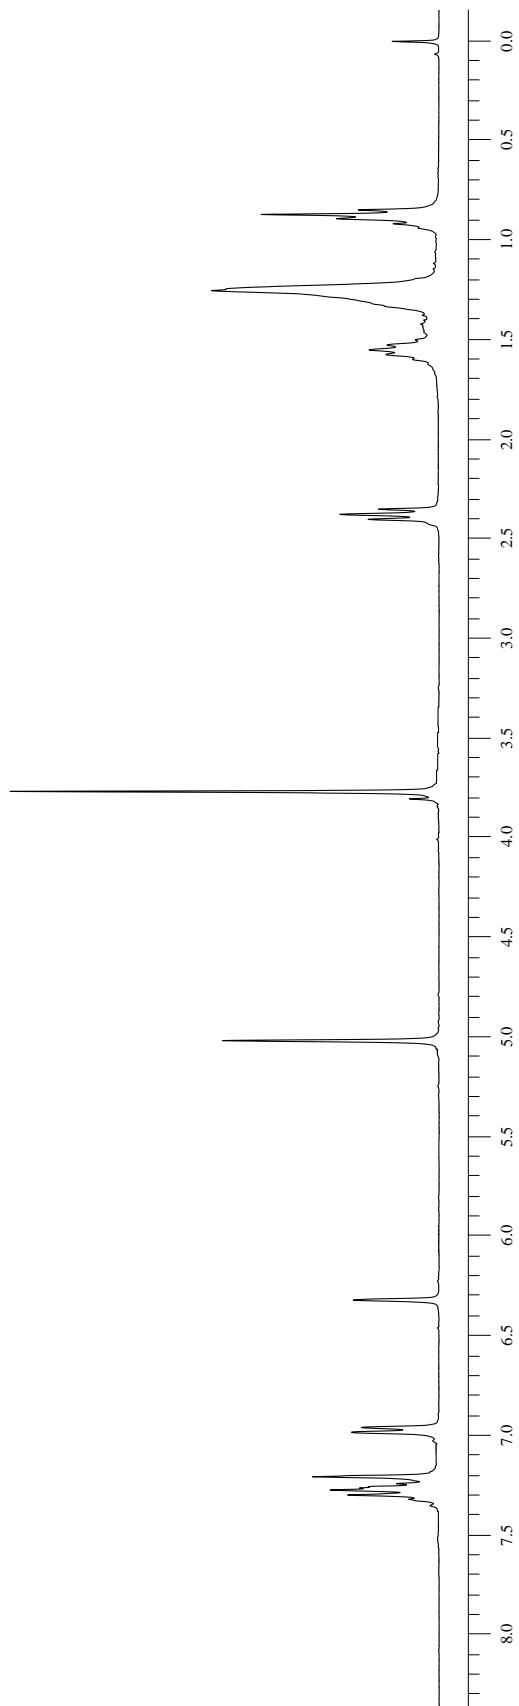

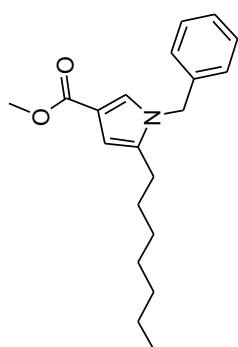

**3k**

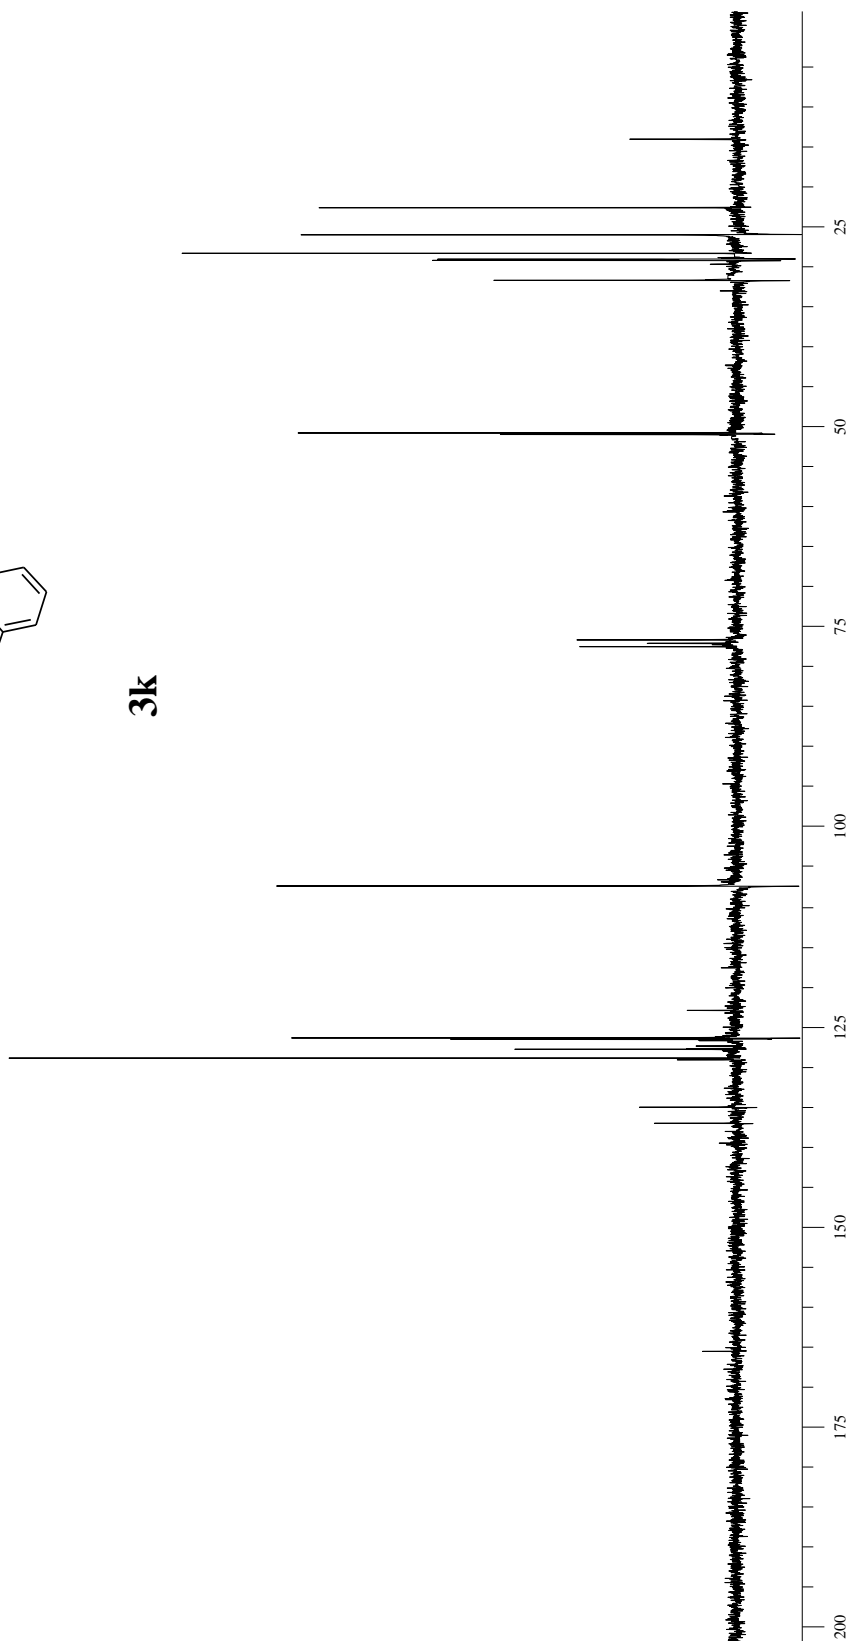

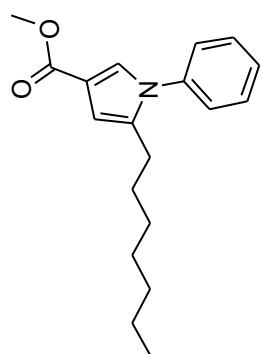

**31**

S32

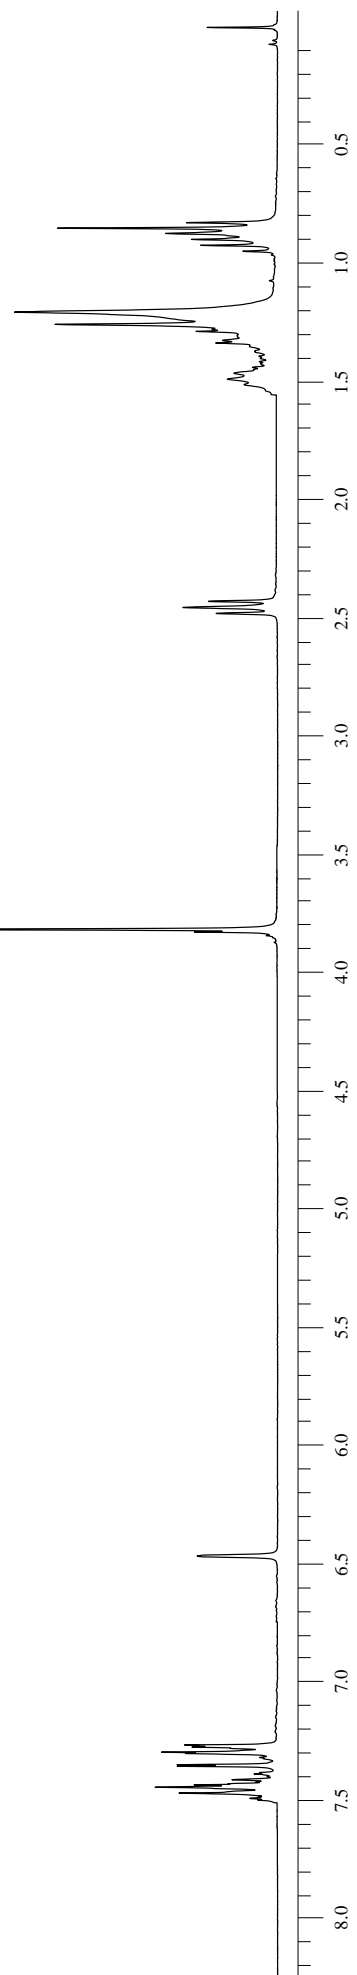



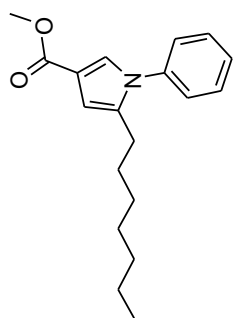

**31**

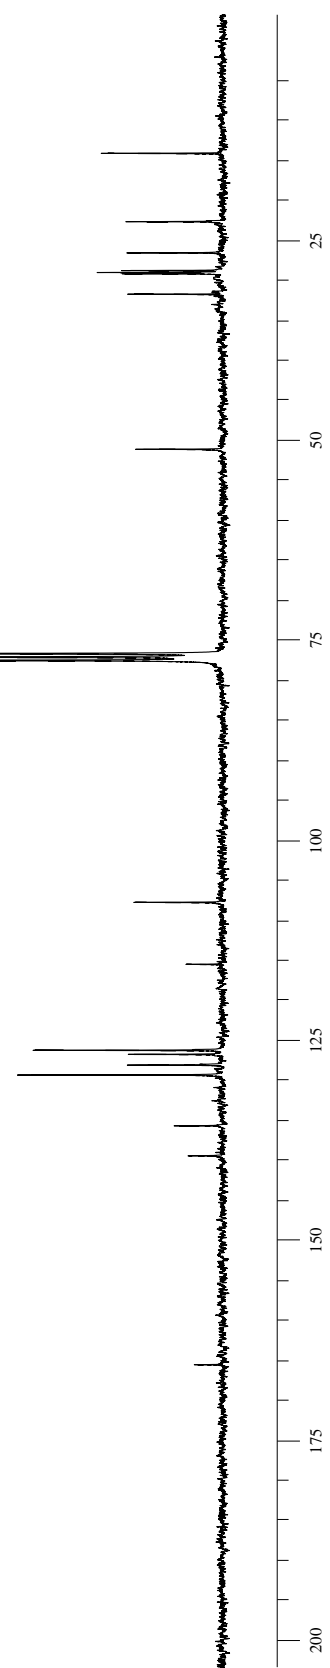

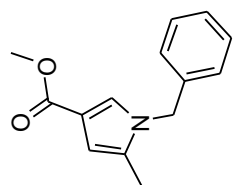

**3m**

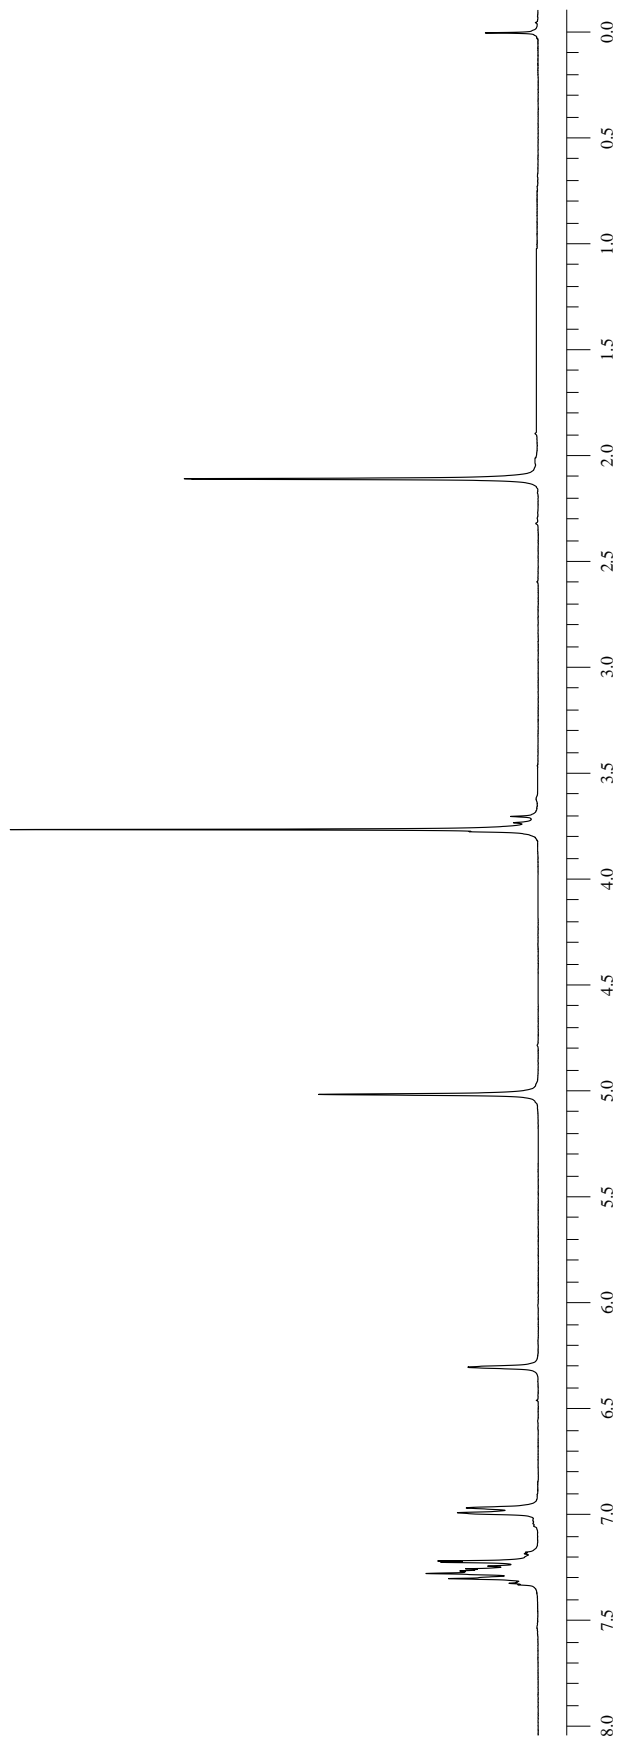

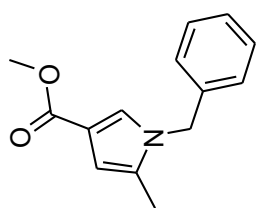

**3m**

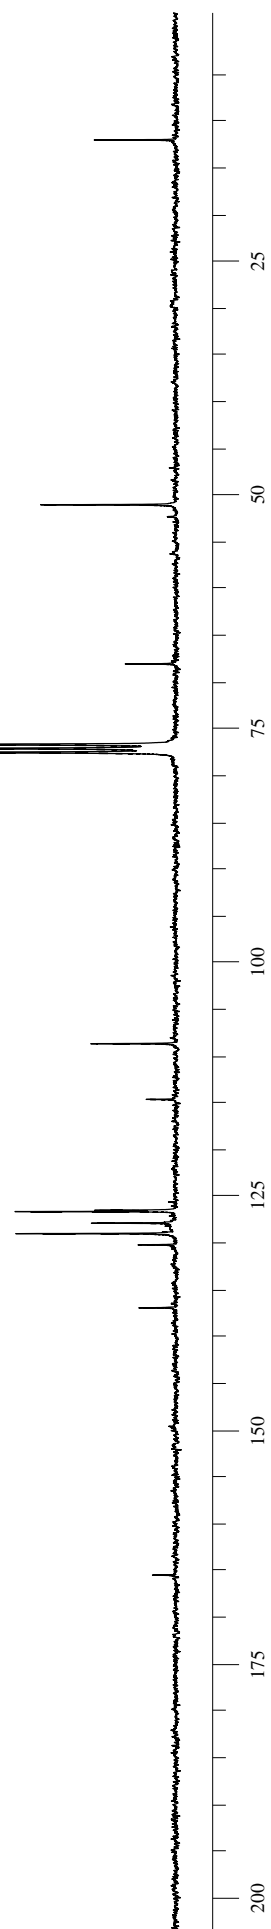

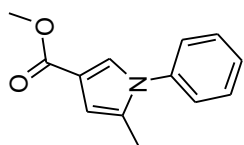

**3n**

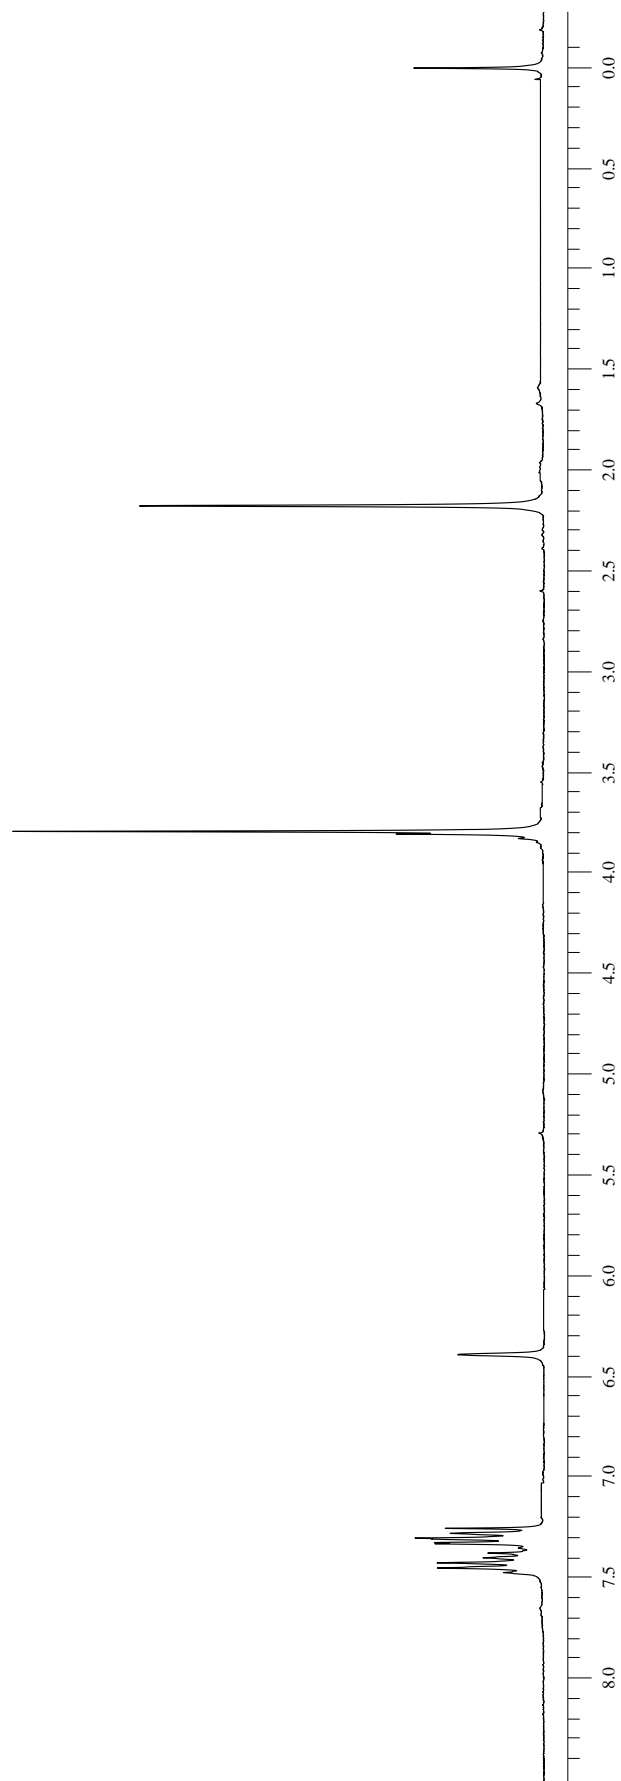

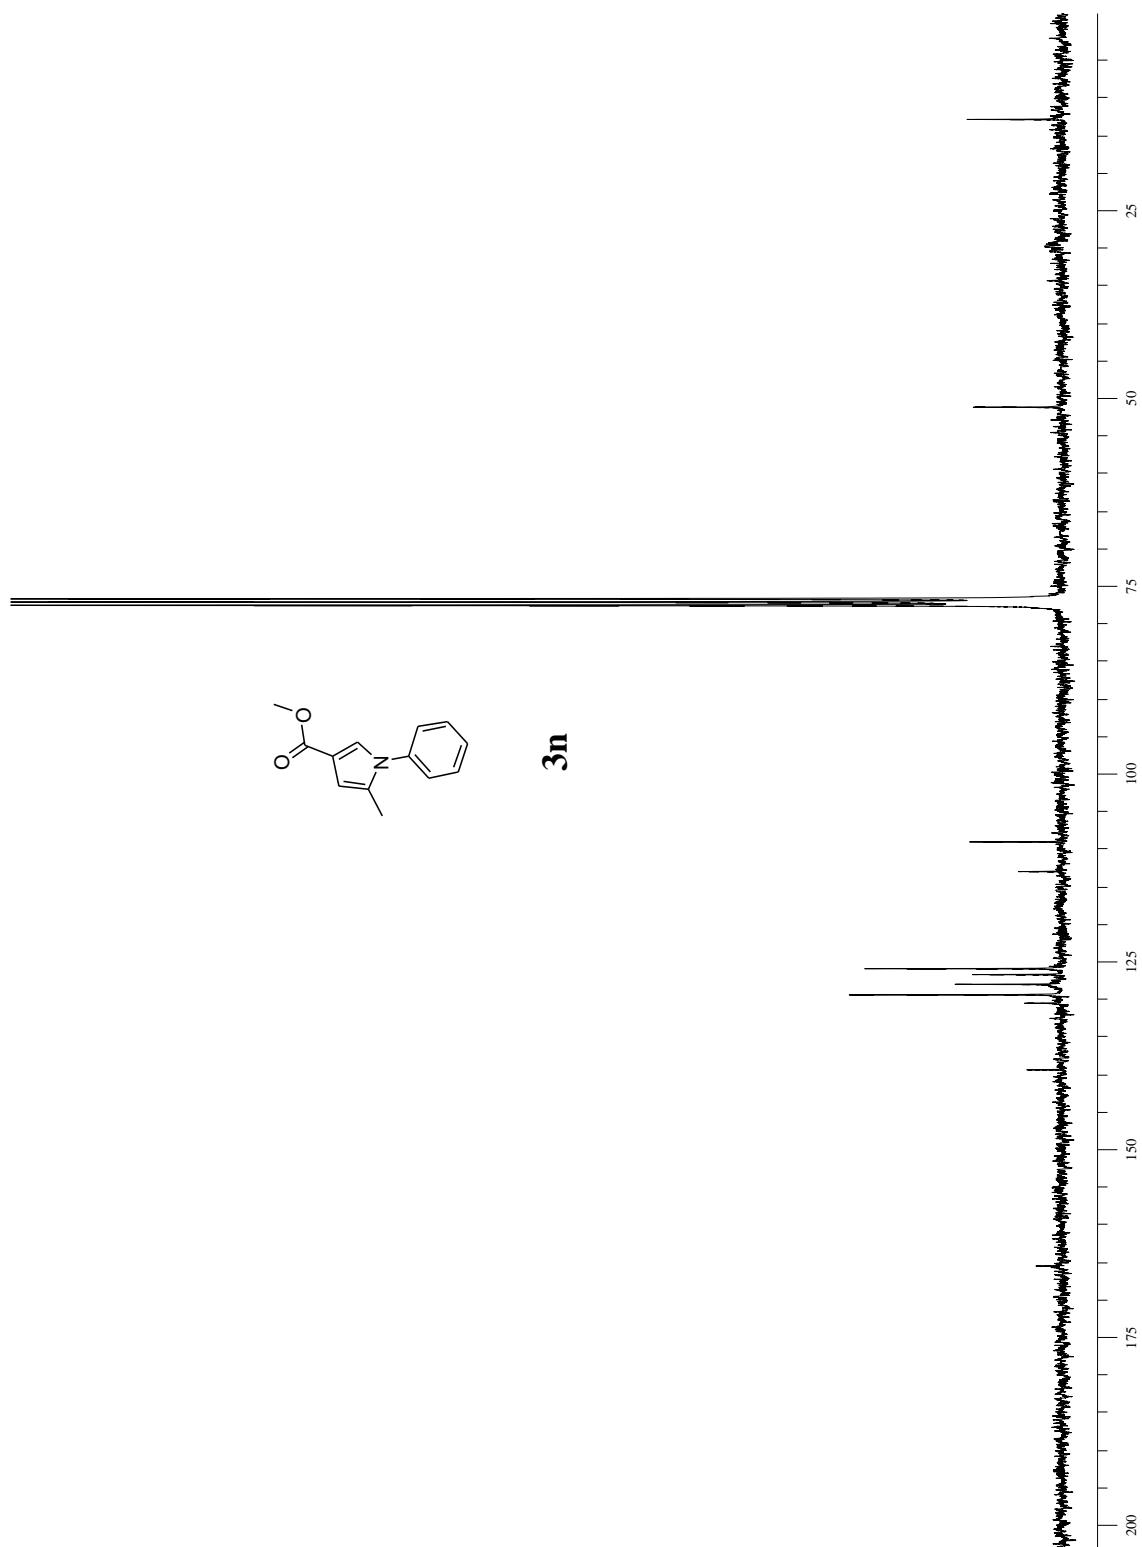

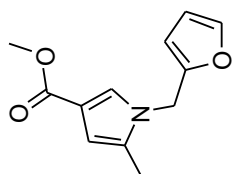

**30**

S38

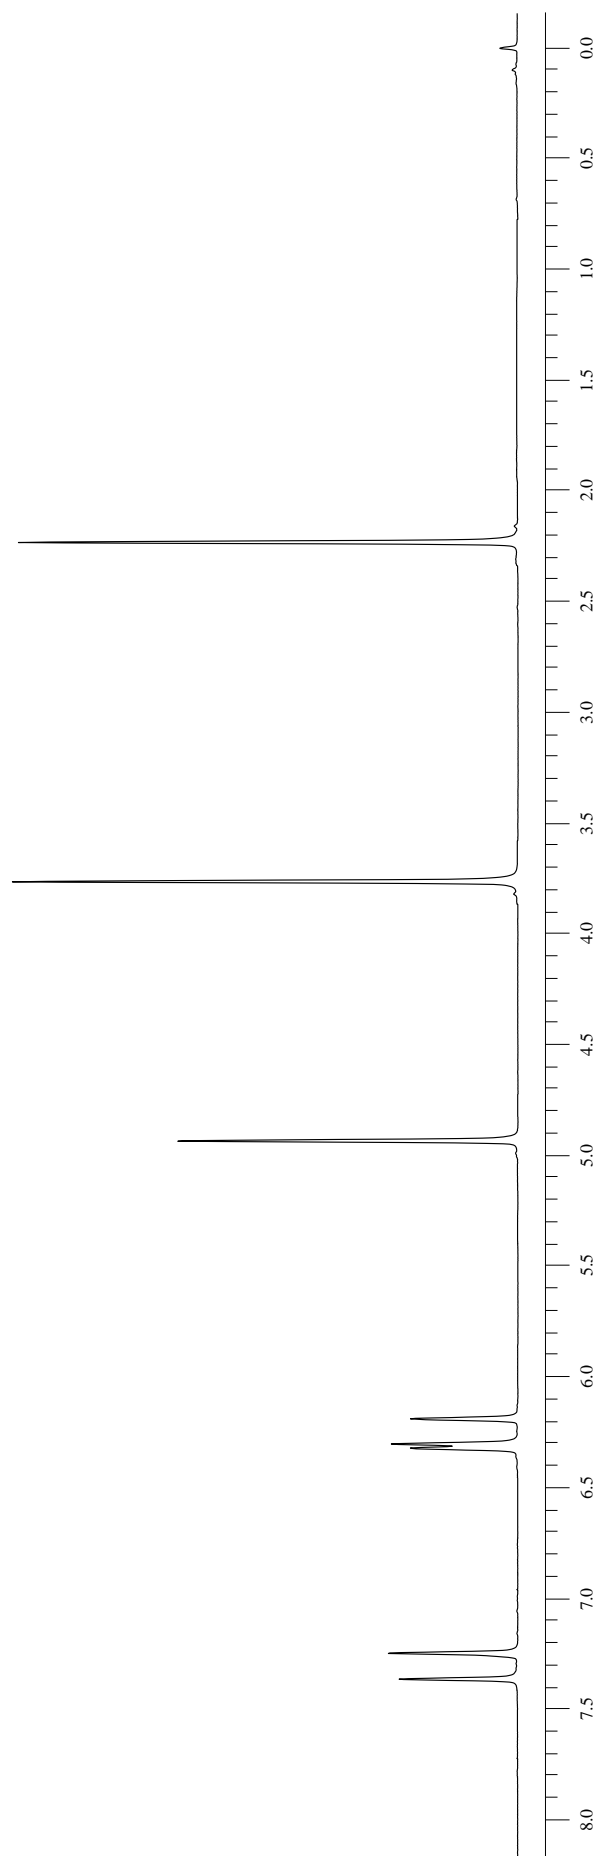

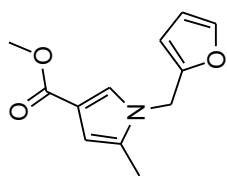

**30**

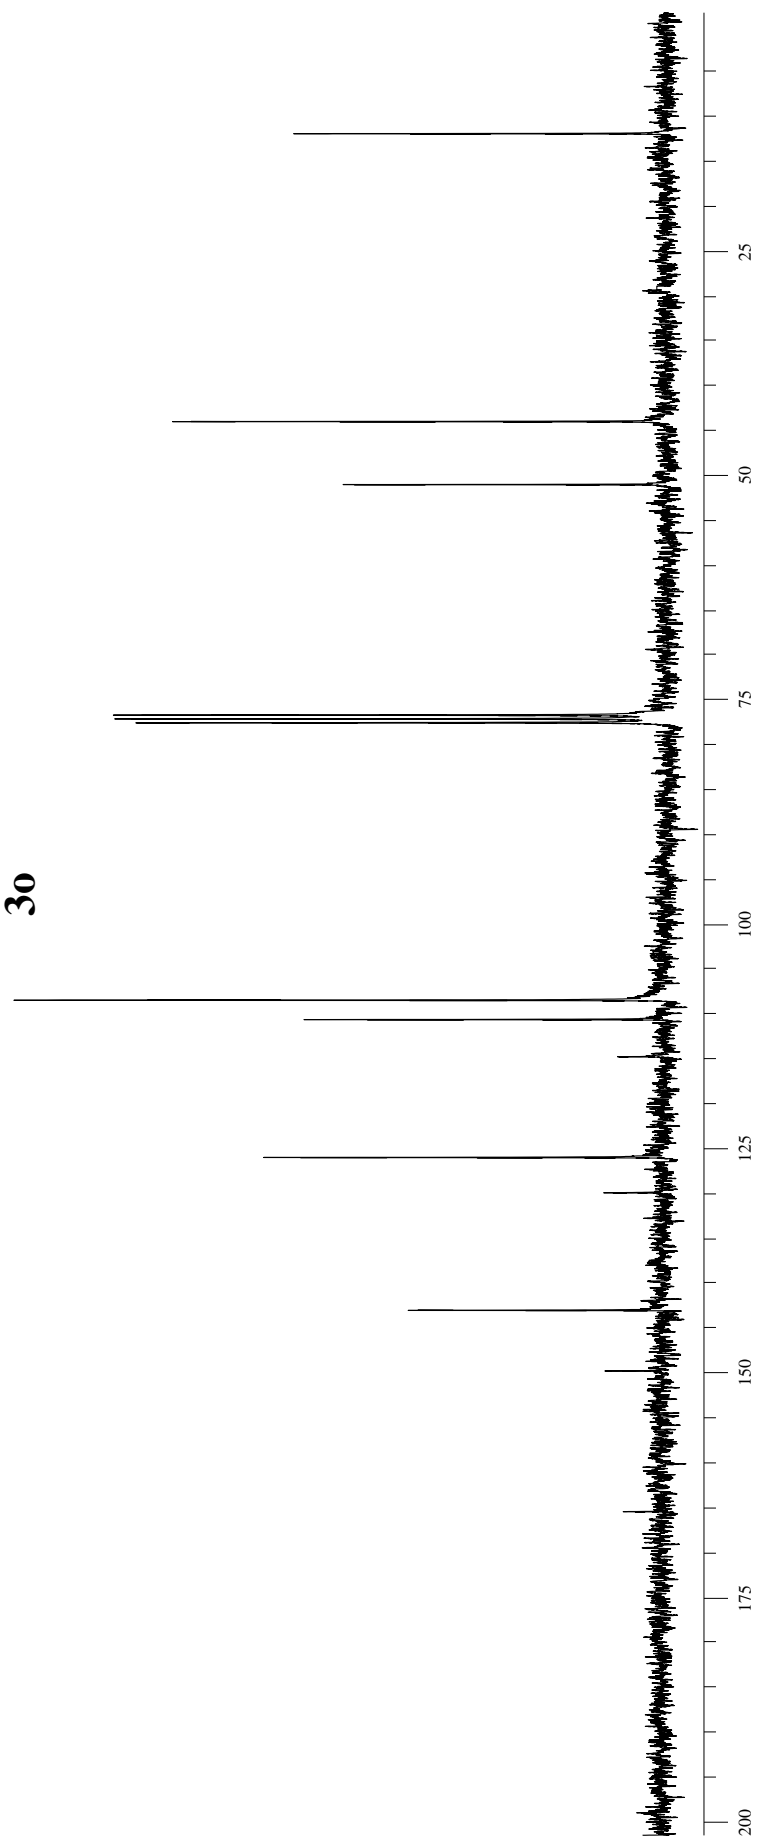

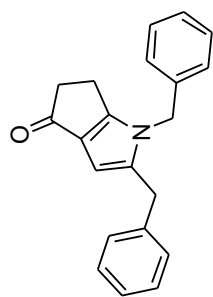

**3p**

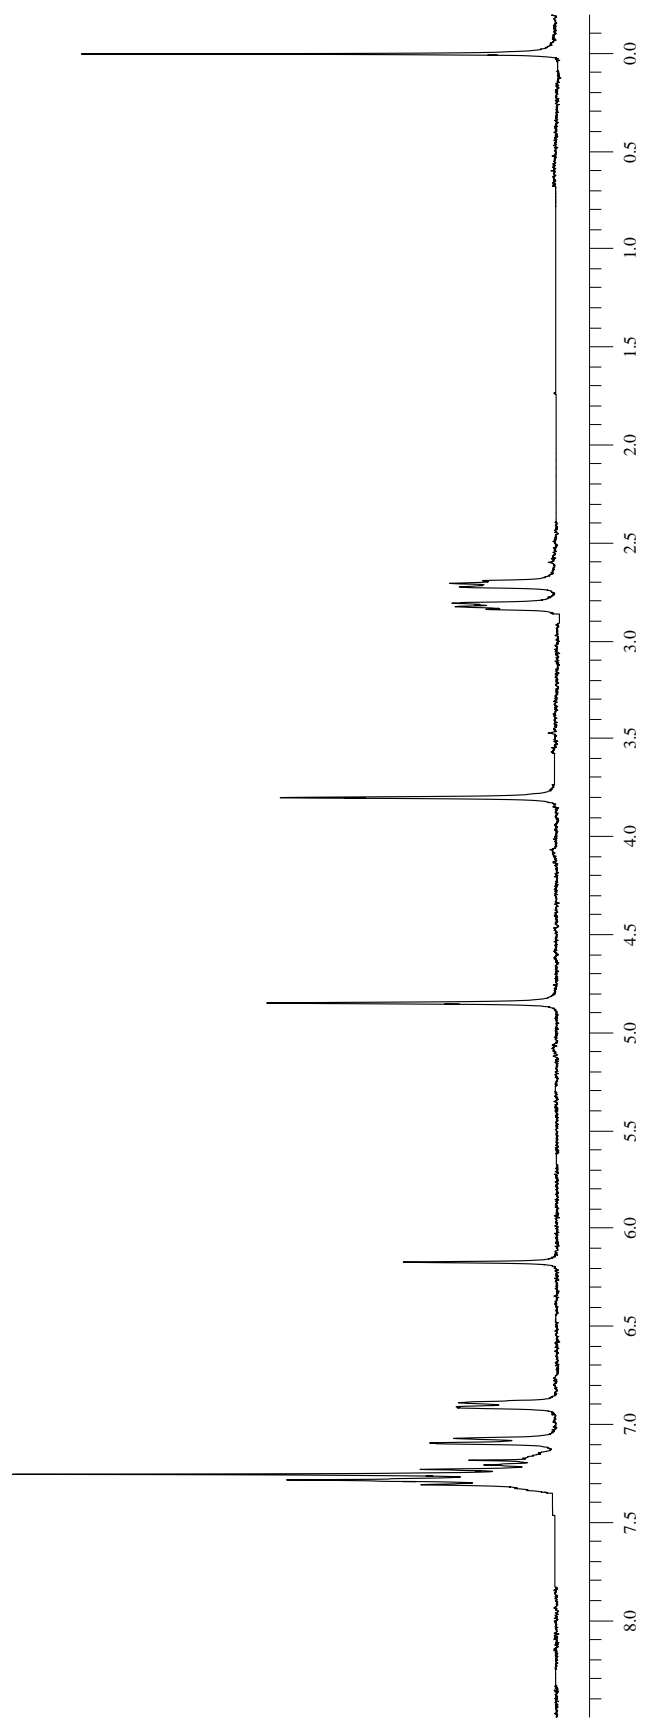



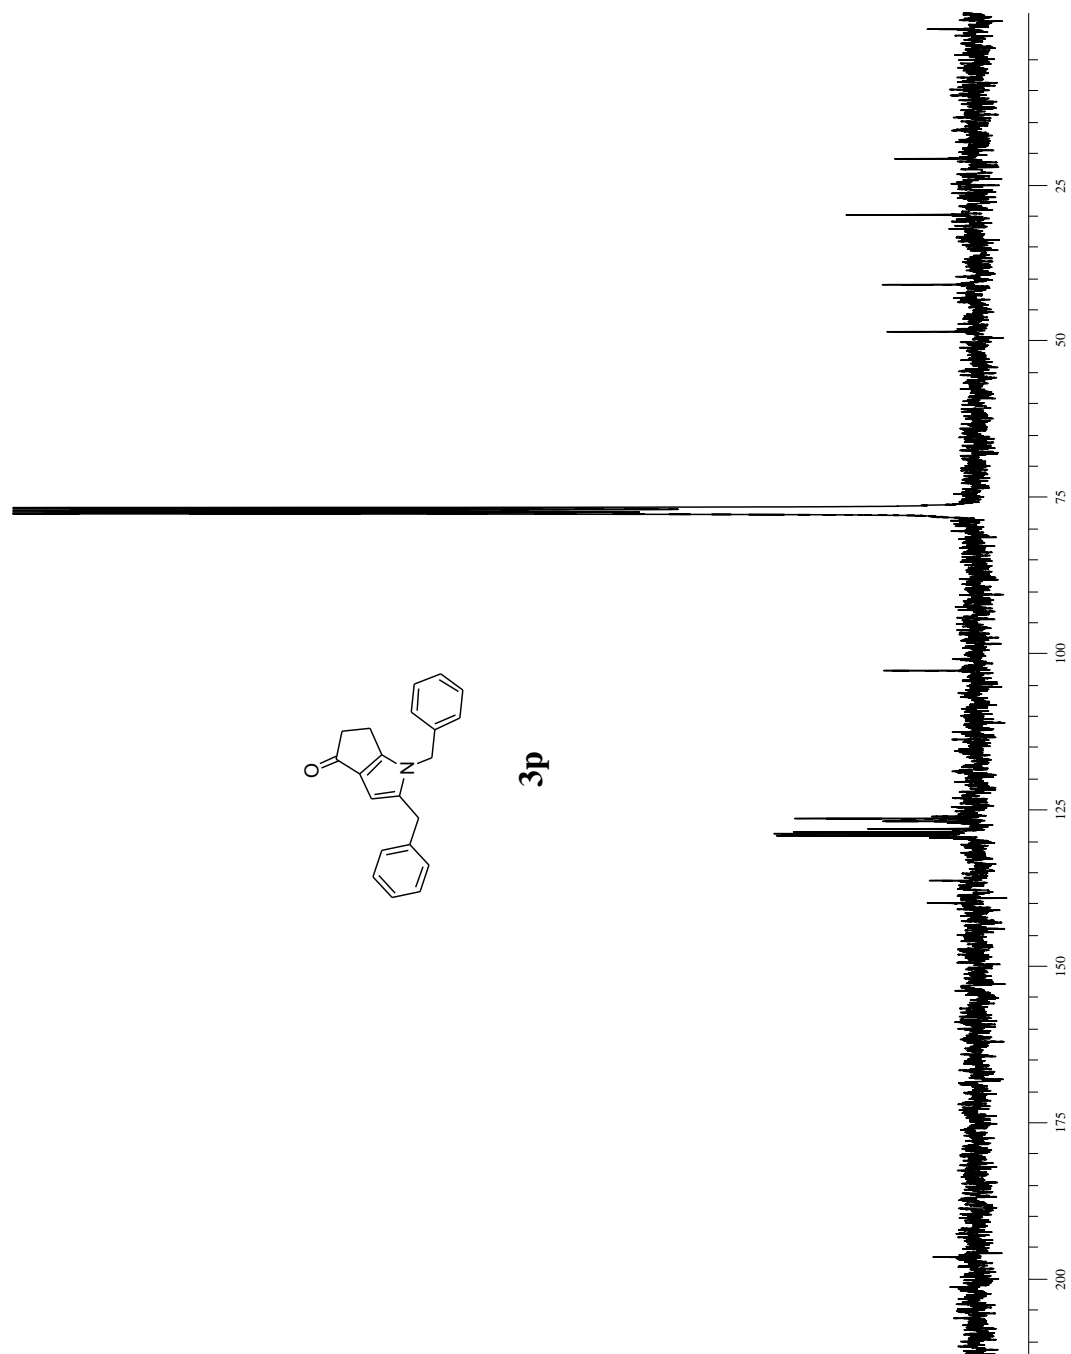

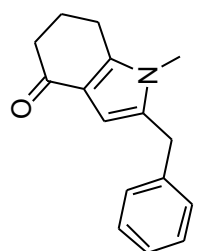

**3q**

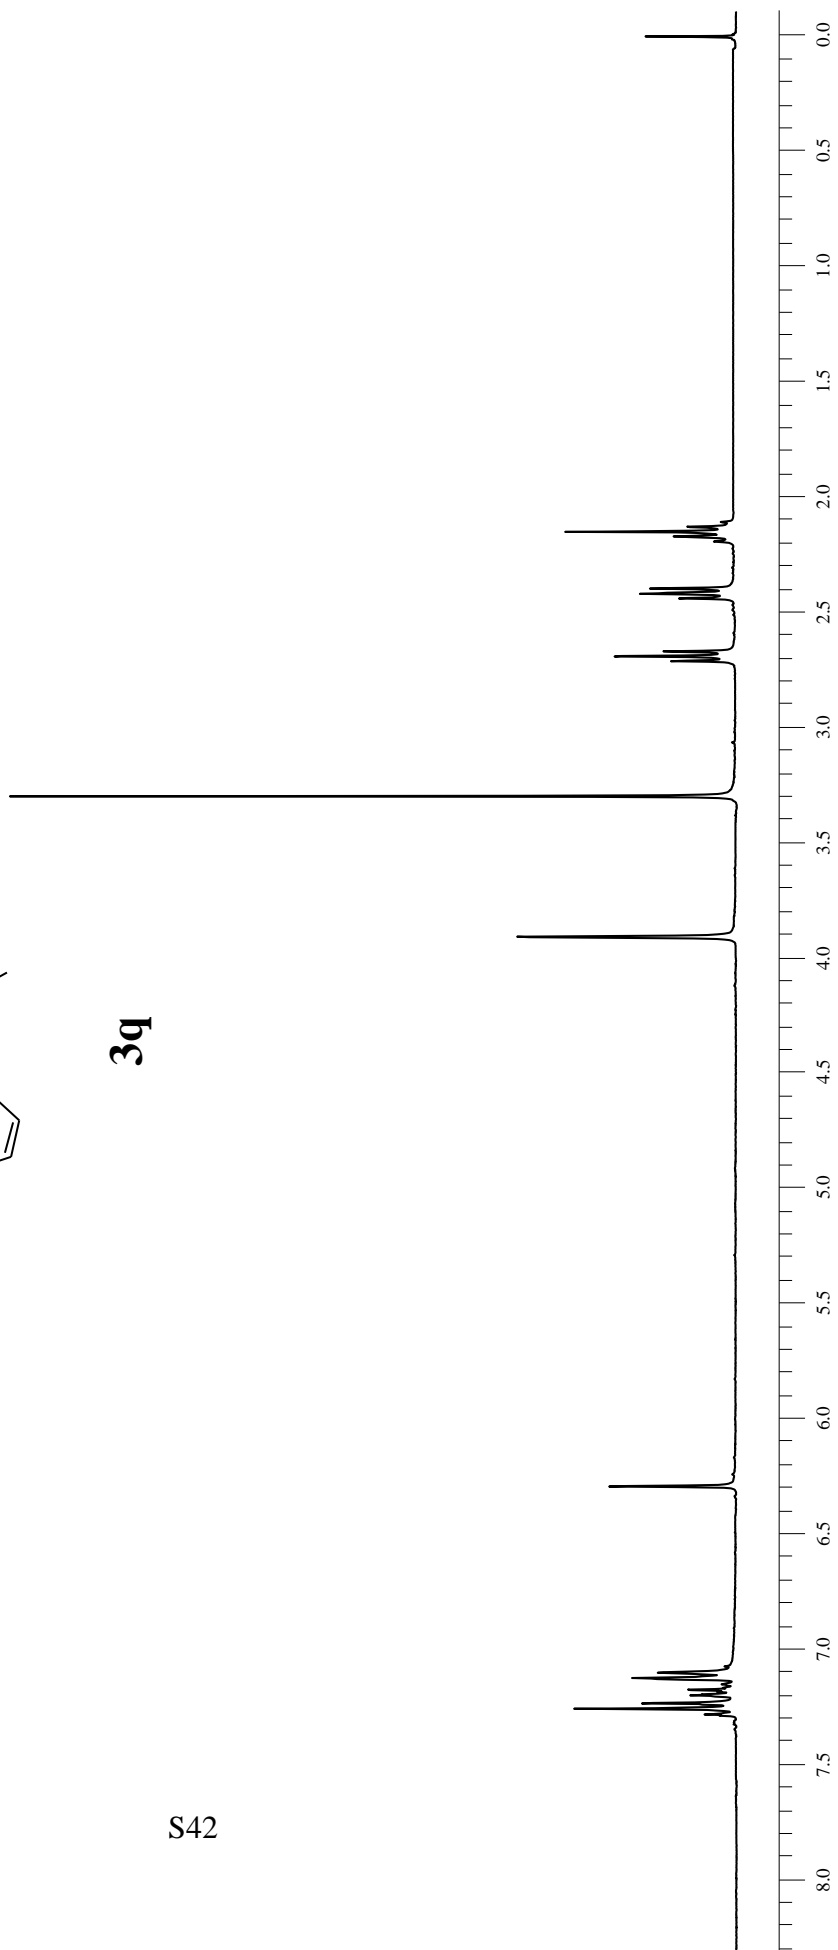

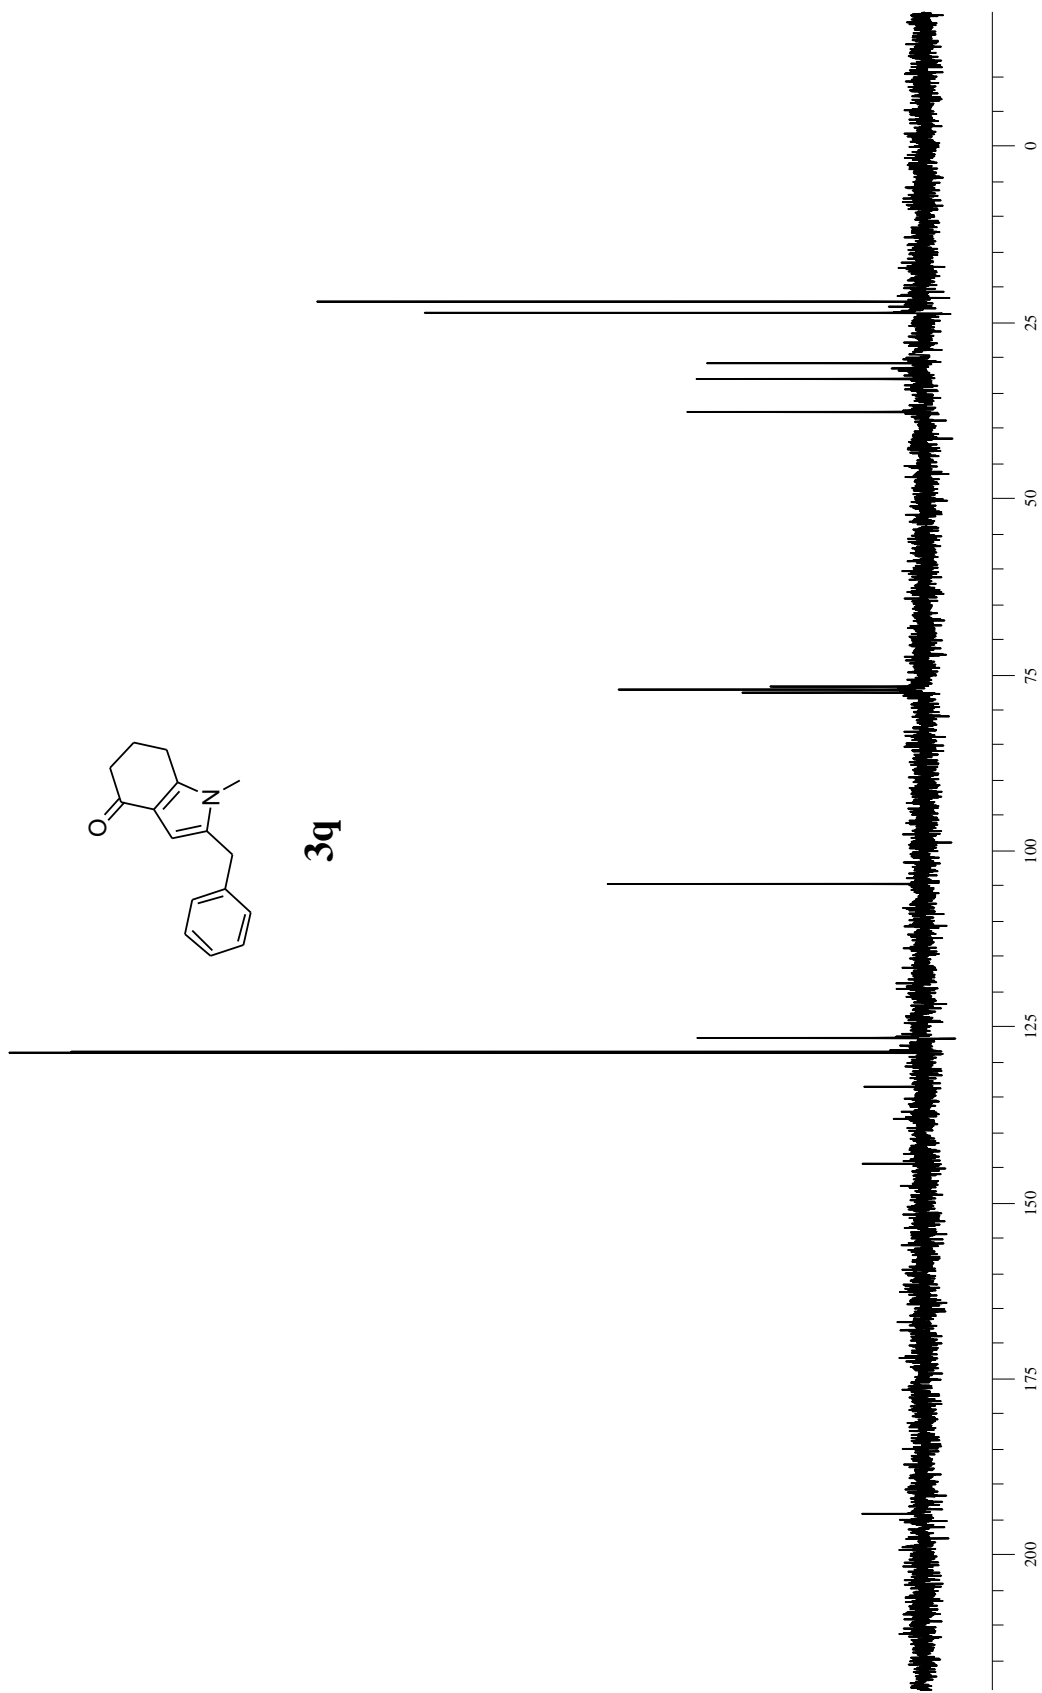





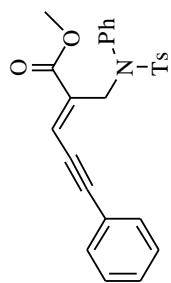

**4b**

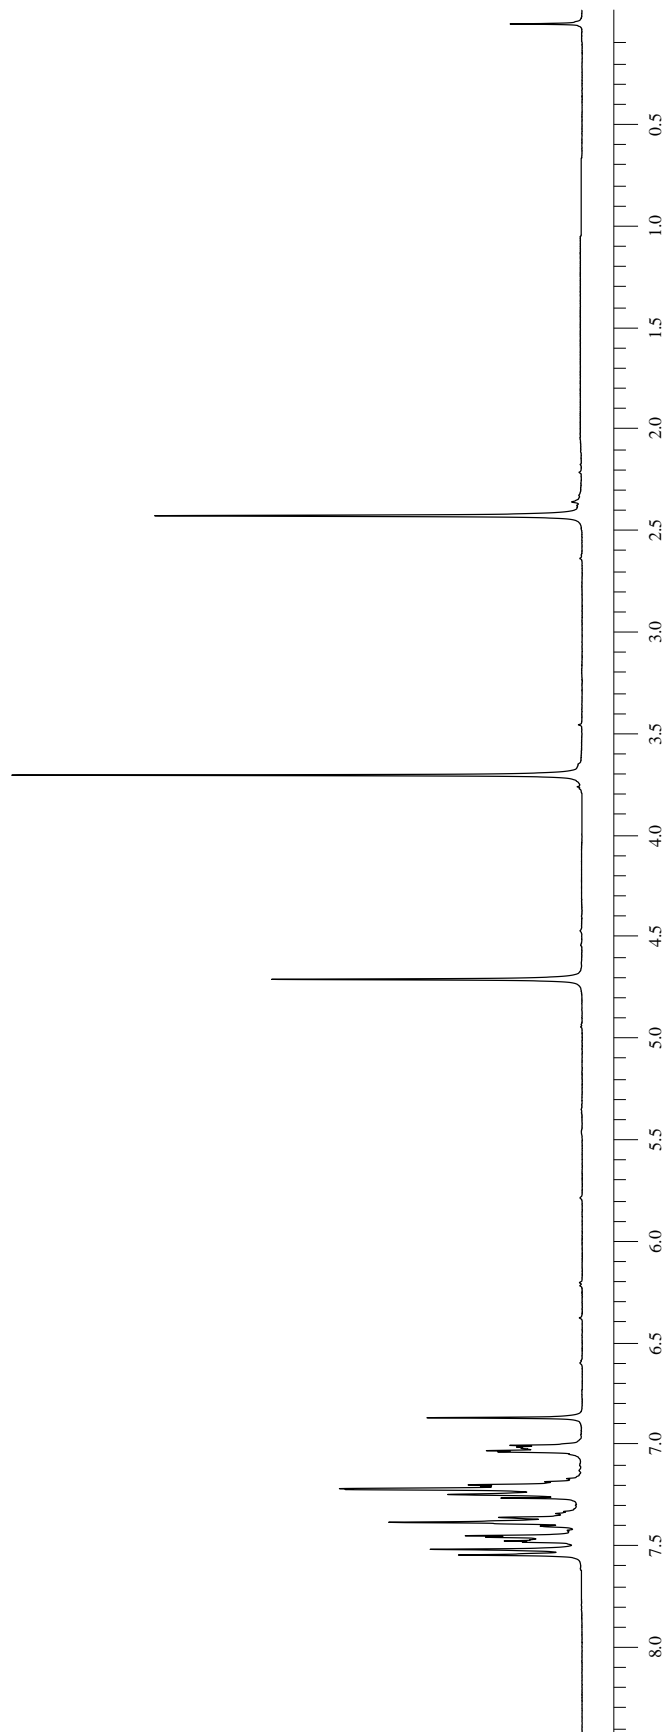

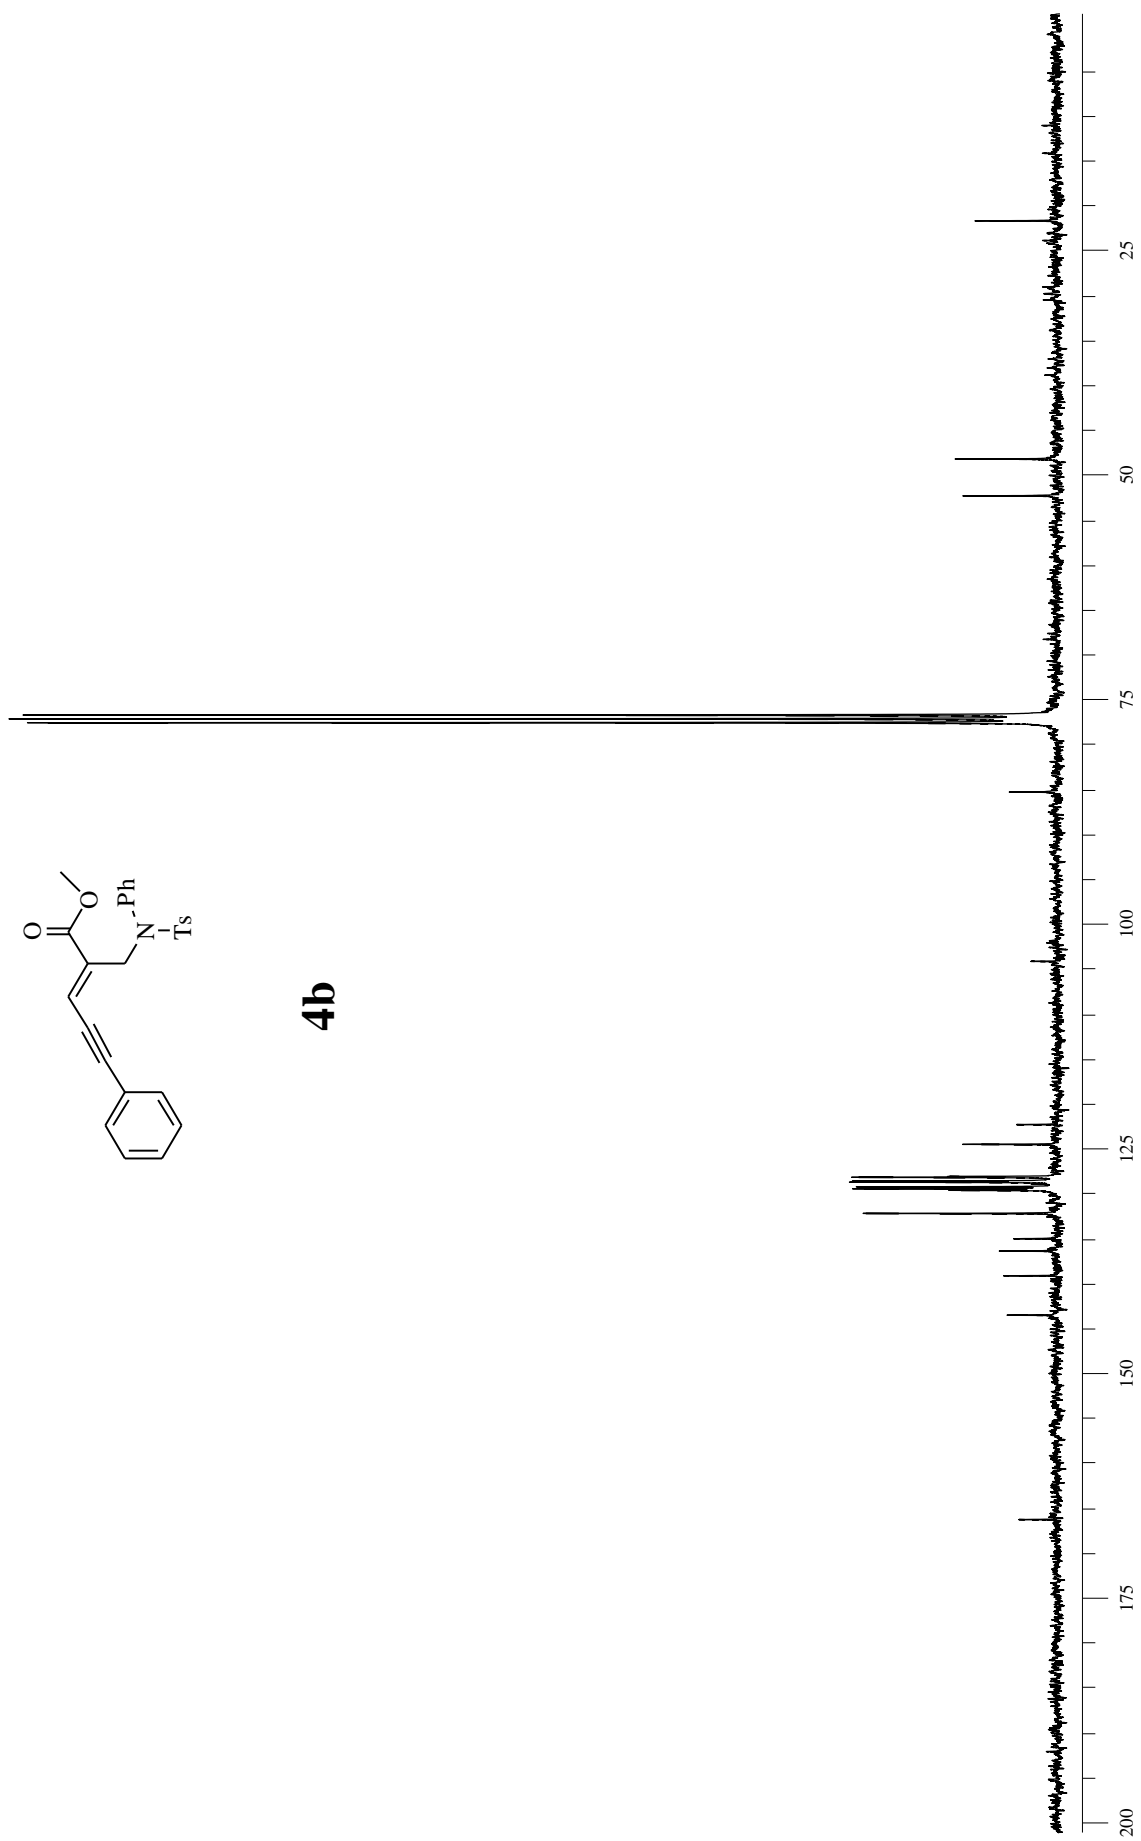

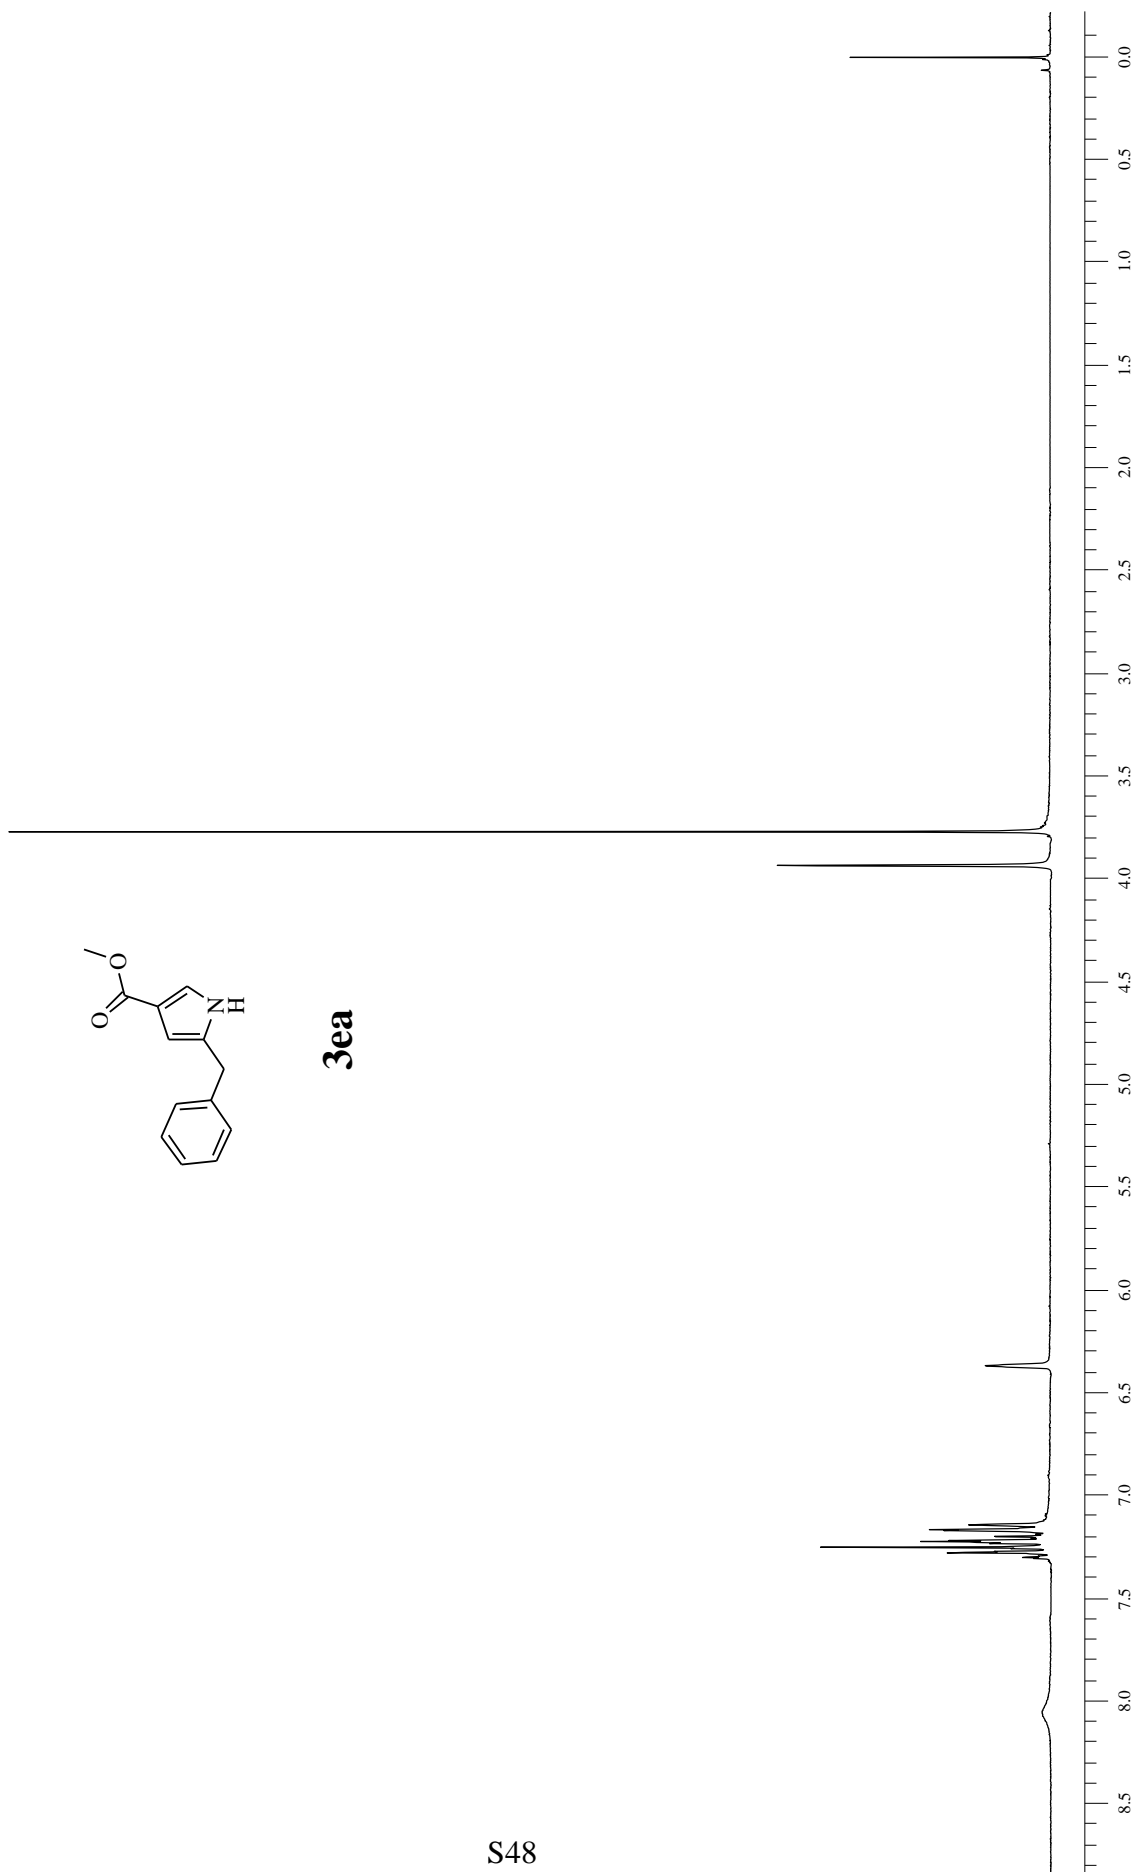



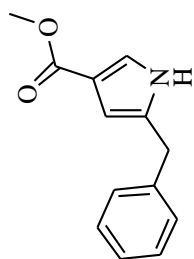

**3ea**

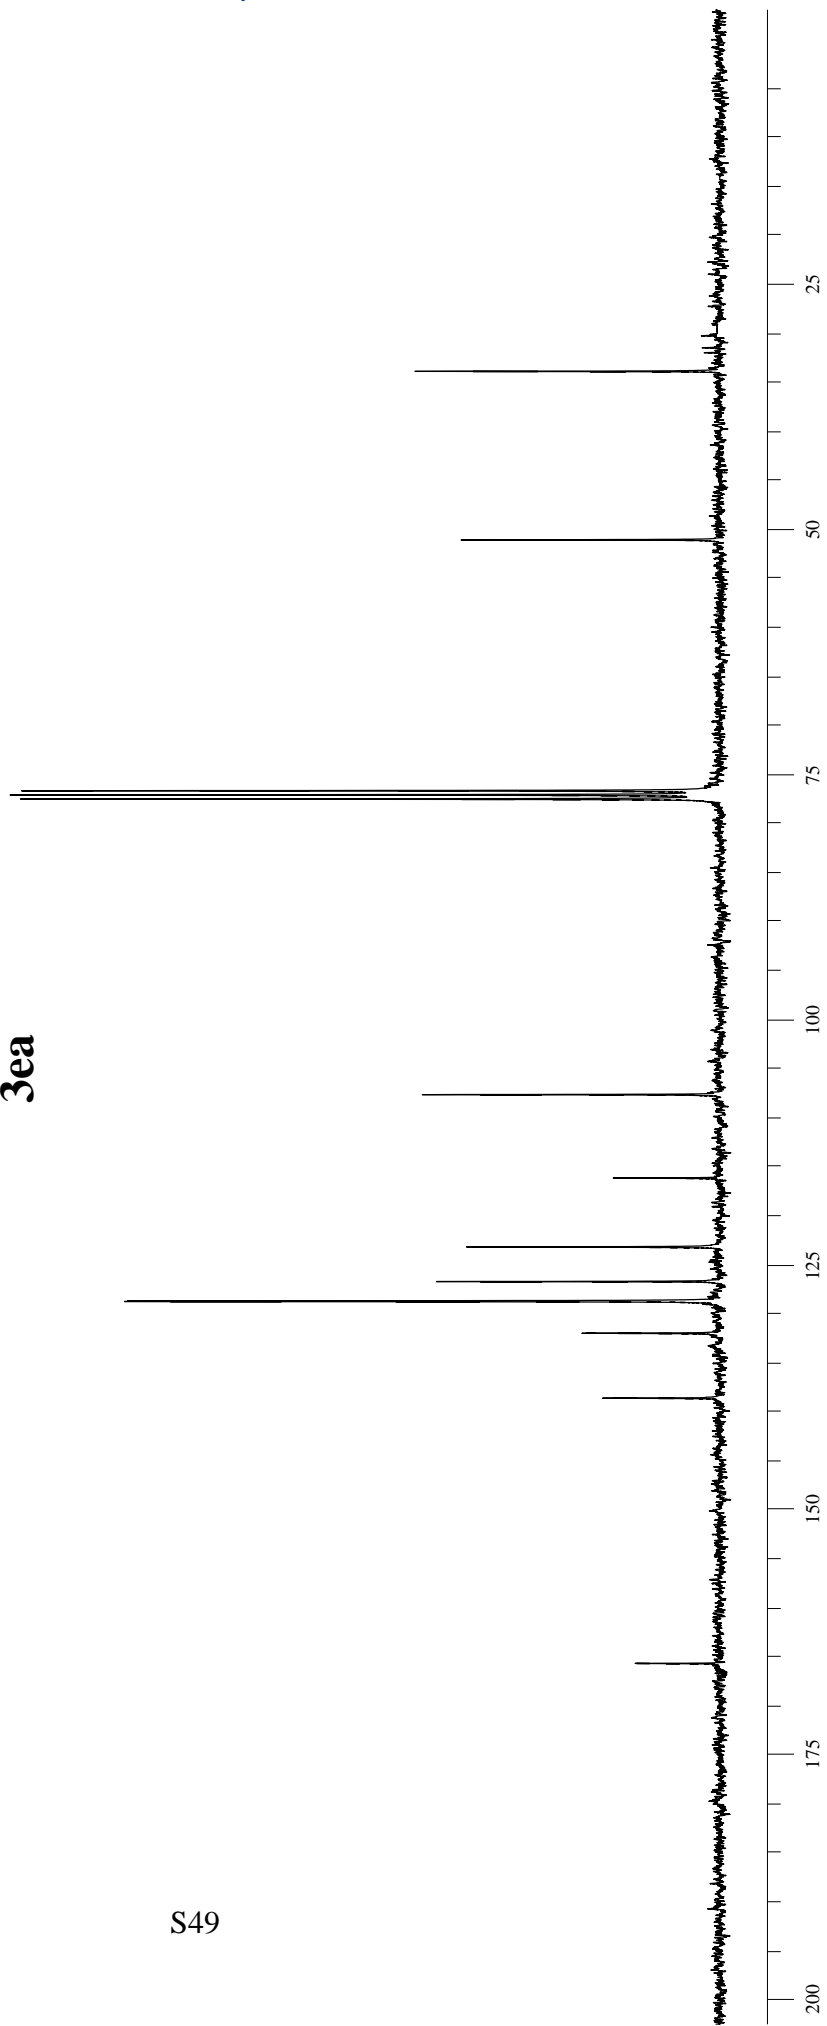

Expanded region of the NMR-NOESY spectrum of compound **4a** (in CDCl<sub>3</sub> 300 MHz)

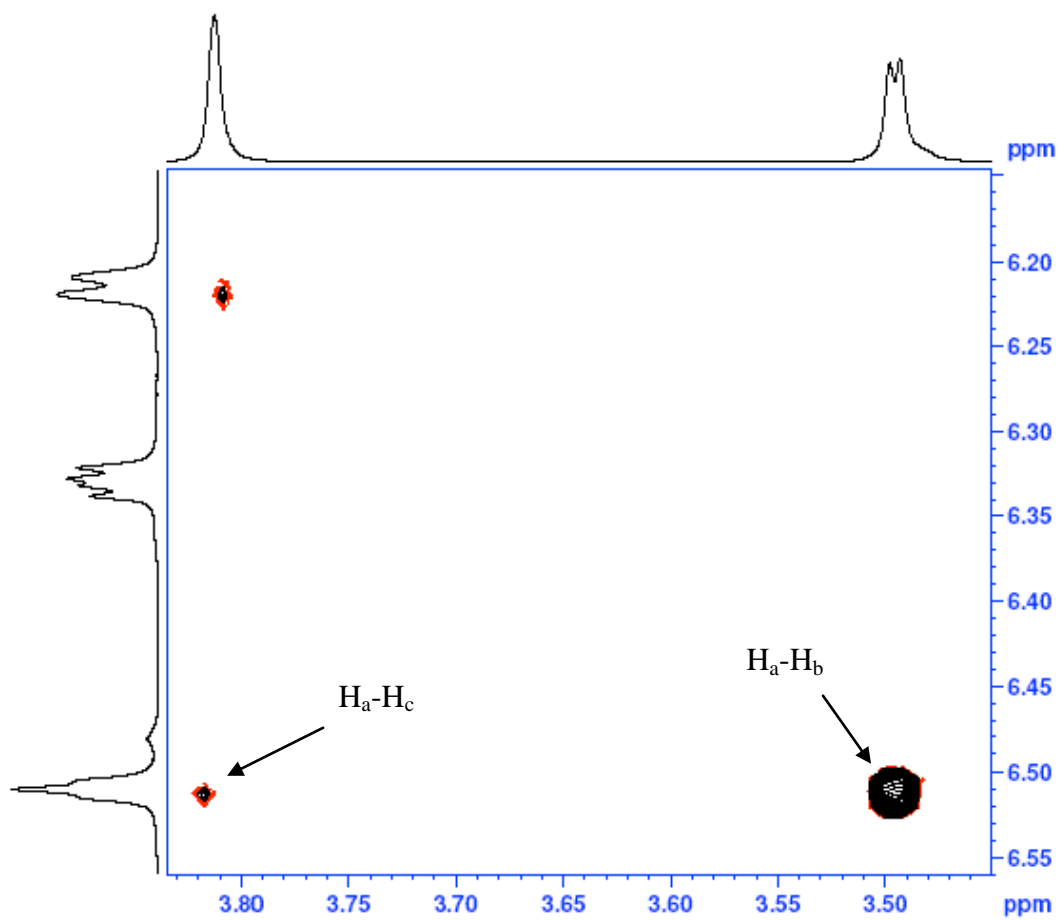

Compound **4a**

Expanded region of the NMR-NOESY spectrum of compound **4b** (in CDCl<sub>3</sub> 300 MHz)

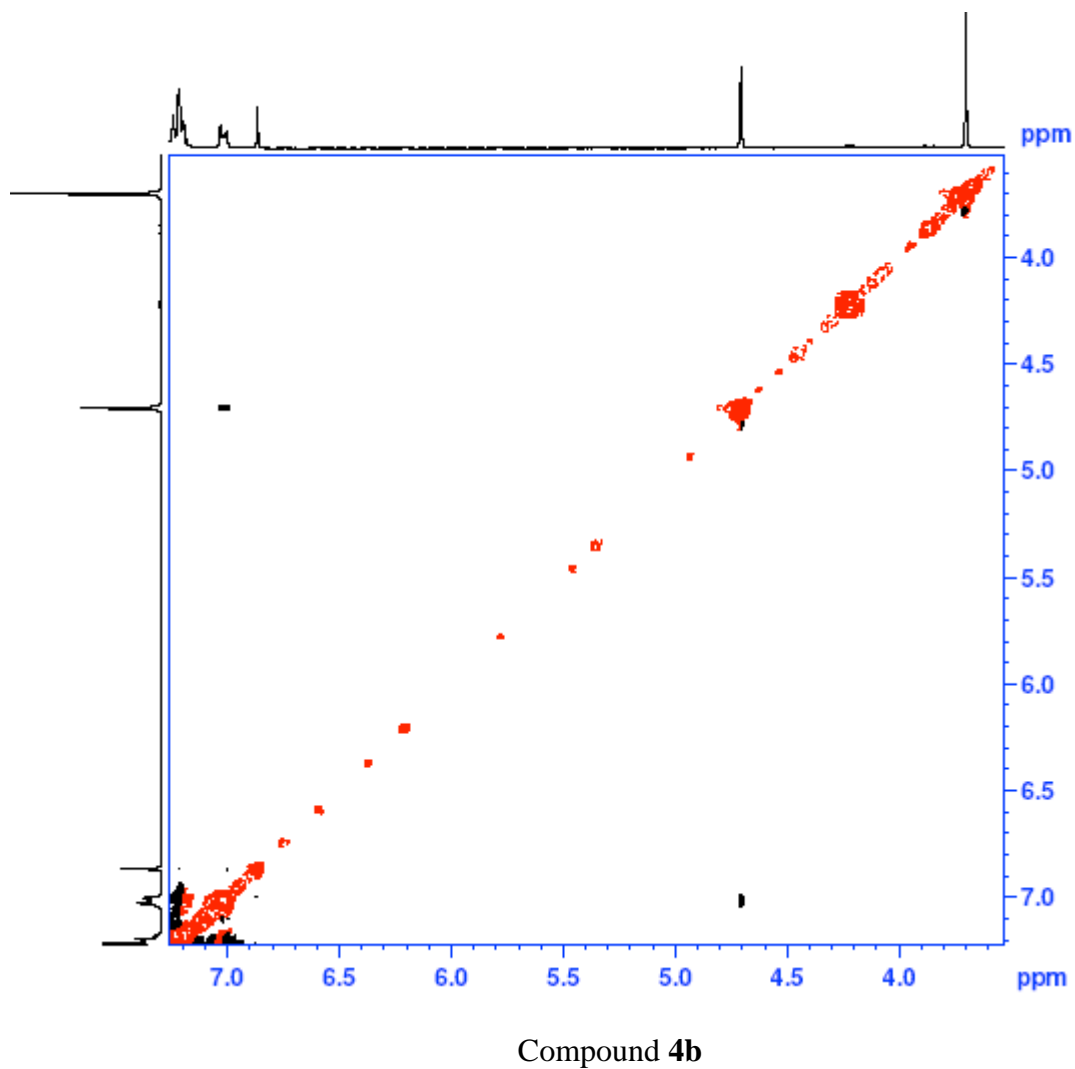

Supplement: c1ob05402c.pdf [file c1ob05402c.pdf]
